# Supplementary material for: On the use of approximate entropy and sample entropy with centre of pressure time-series
Source: Springer Nature journal article supplement (doi:10.1186/s12984-018-0465-9), 2018-12-01
Supplement: MOESM1 [file 16336920]

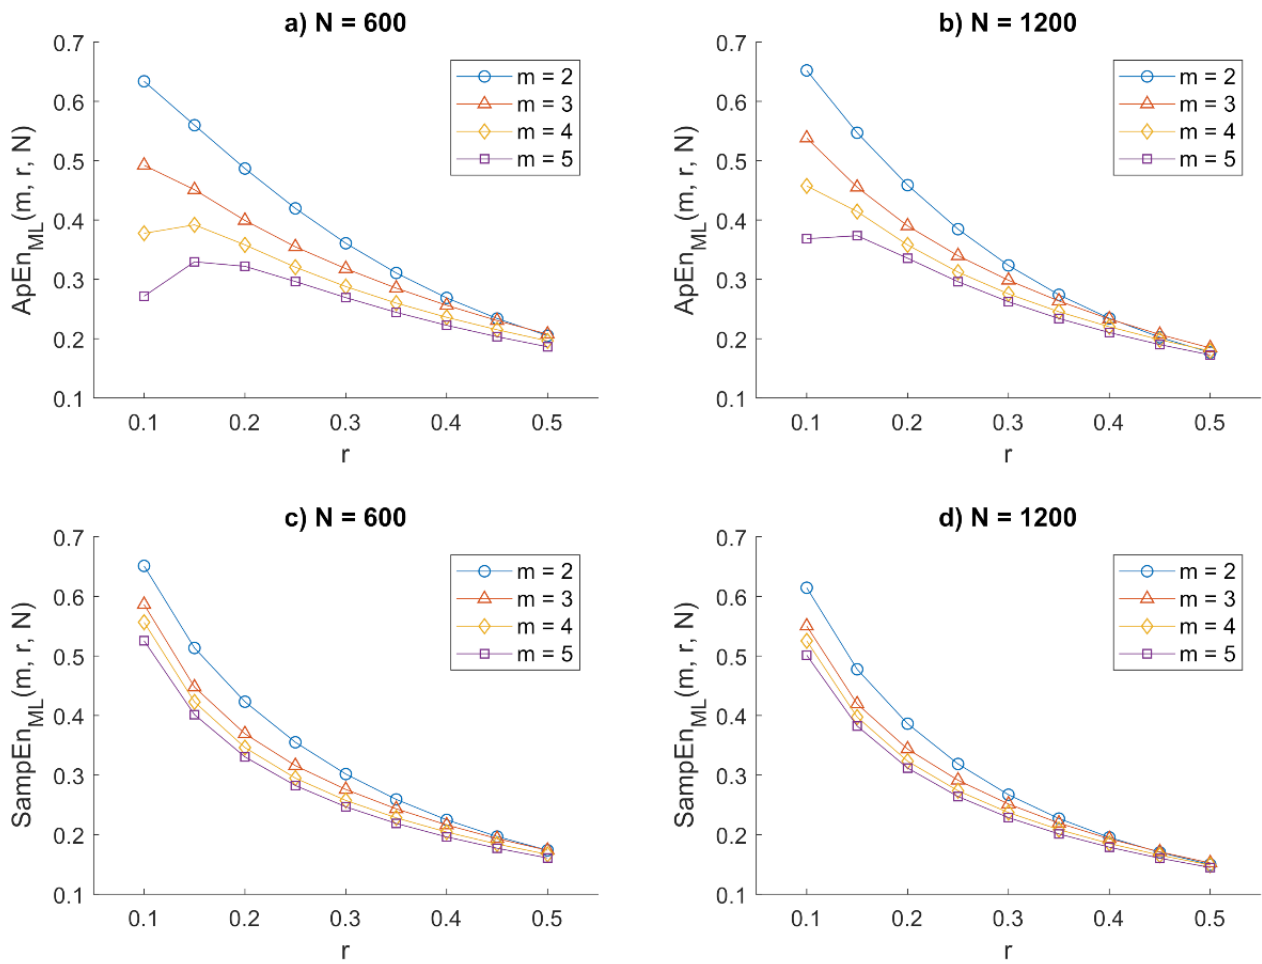

**Fig. S1** Approximate entropy (ApEn) and sample entropy (SampEn) as a function of  $m$ ,  $r$  and  $N$  for the medial-lateral (ML) component of the centre of pressure displacement during quiet standing.

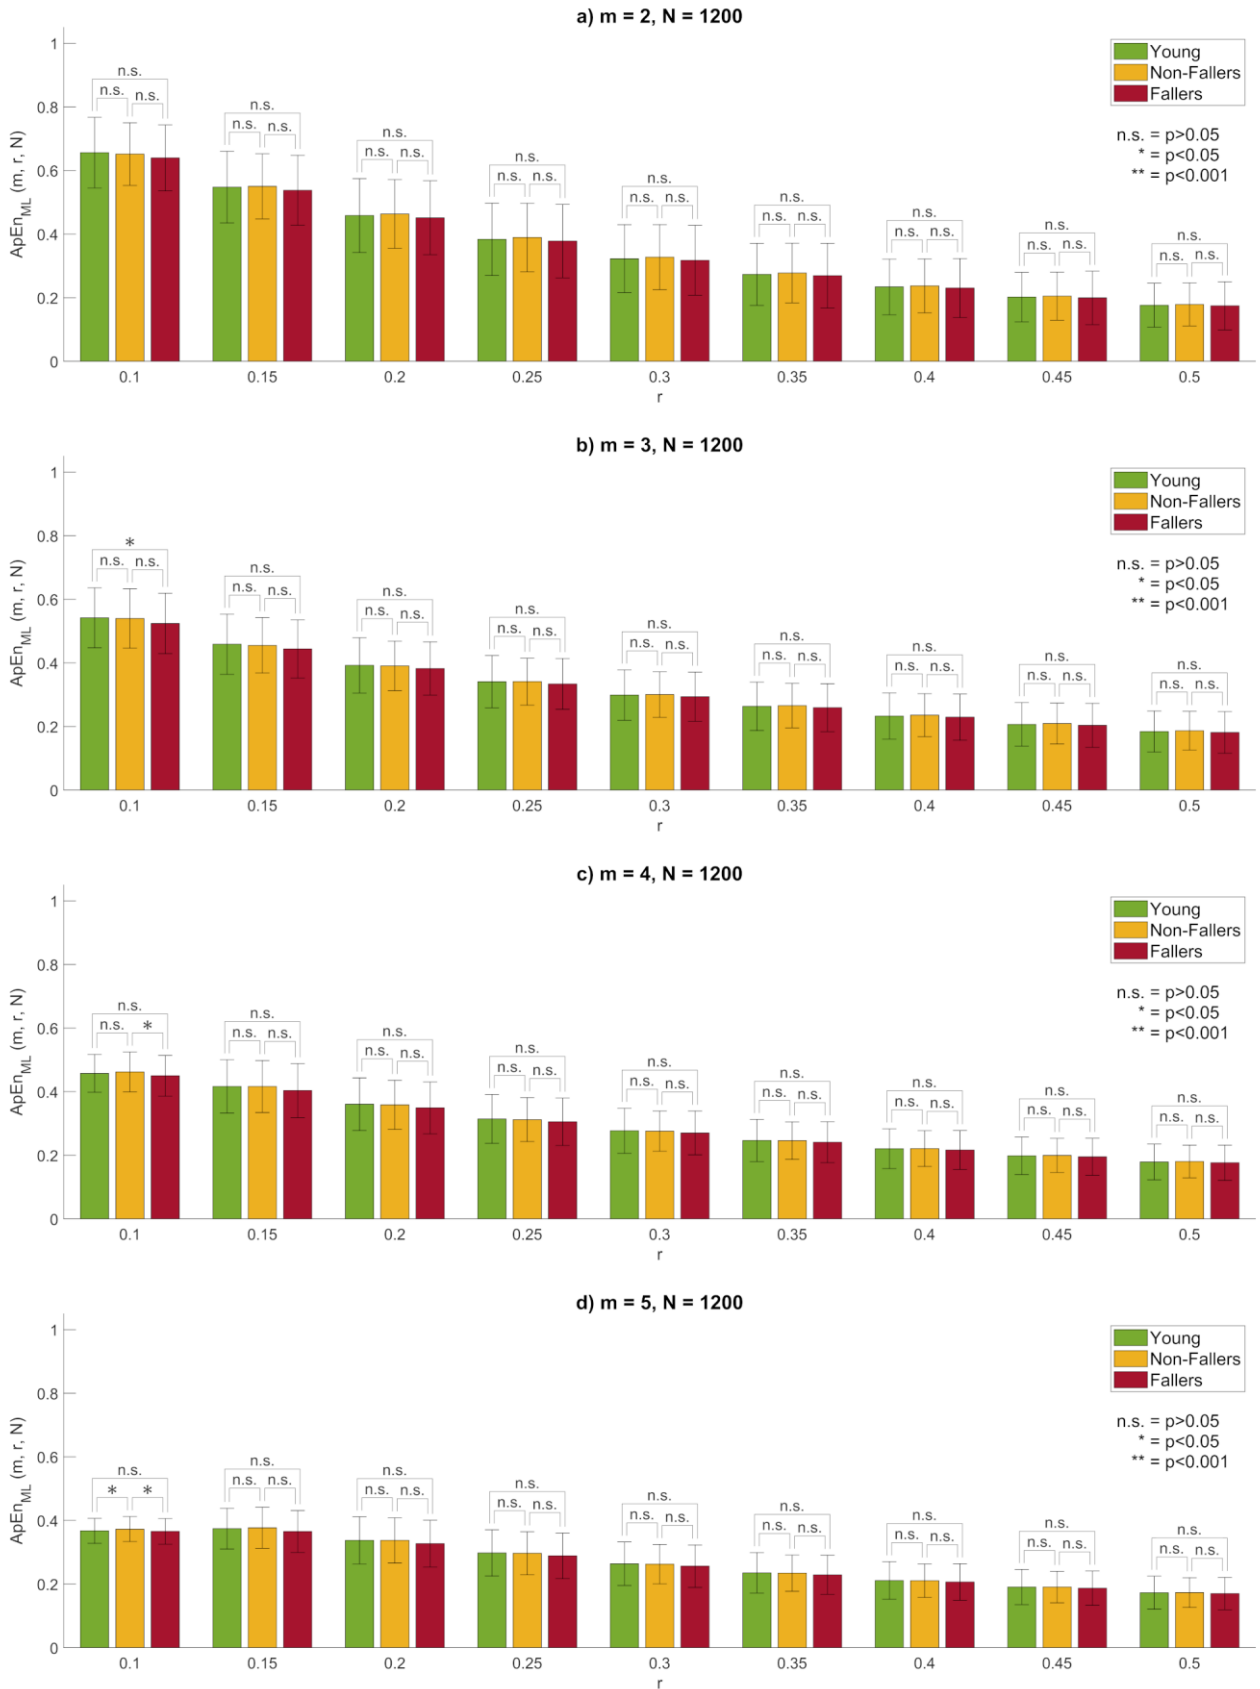

**Fig. S2** Approximate entropy (ApEn) mean value (bars) and standard deviation (error lines) by group as a function of  $r$  for  $m = \{2, 3, 4, 5\}$  (from top to bottom) and  $N = 1200$  (i.e. 60 seconds) for the medial-lateral (ML) component of the centre of pressure displacement during quiet standing.

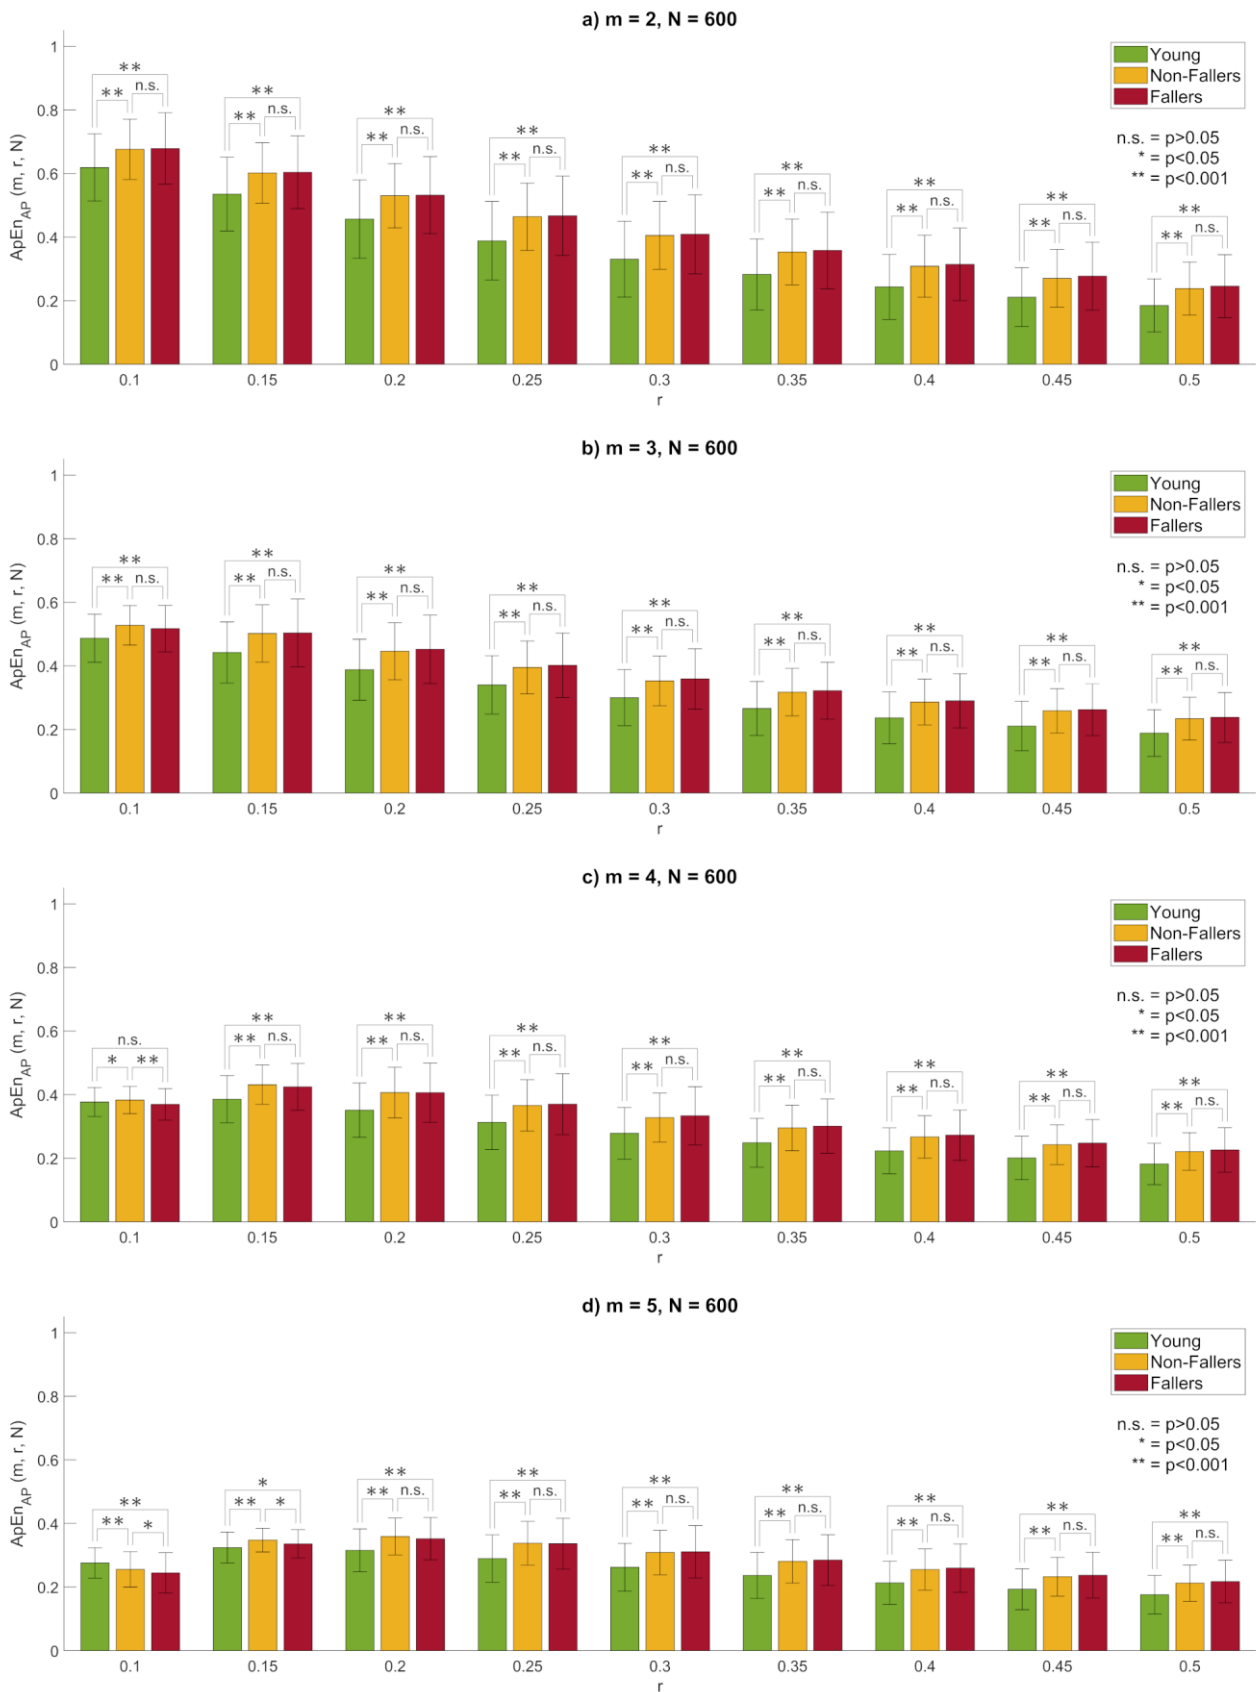

**Fig. S3** Approximate entropy (ApEn) mean value (bars) and standard deviation (error lines) by group as a function of  $r$  for  $m = \{2, 3, 4, 5\}$  (from top to bottom) and  $N = 600$  (i.e. 30 seconds) for the anterior-posterior (AP) component of the centre of pressure displacement during quiet standing.

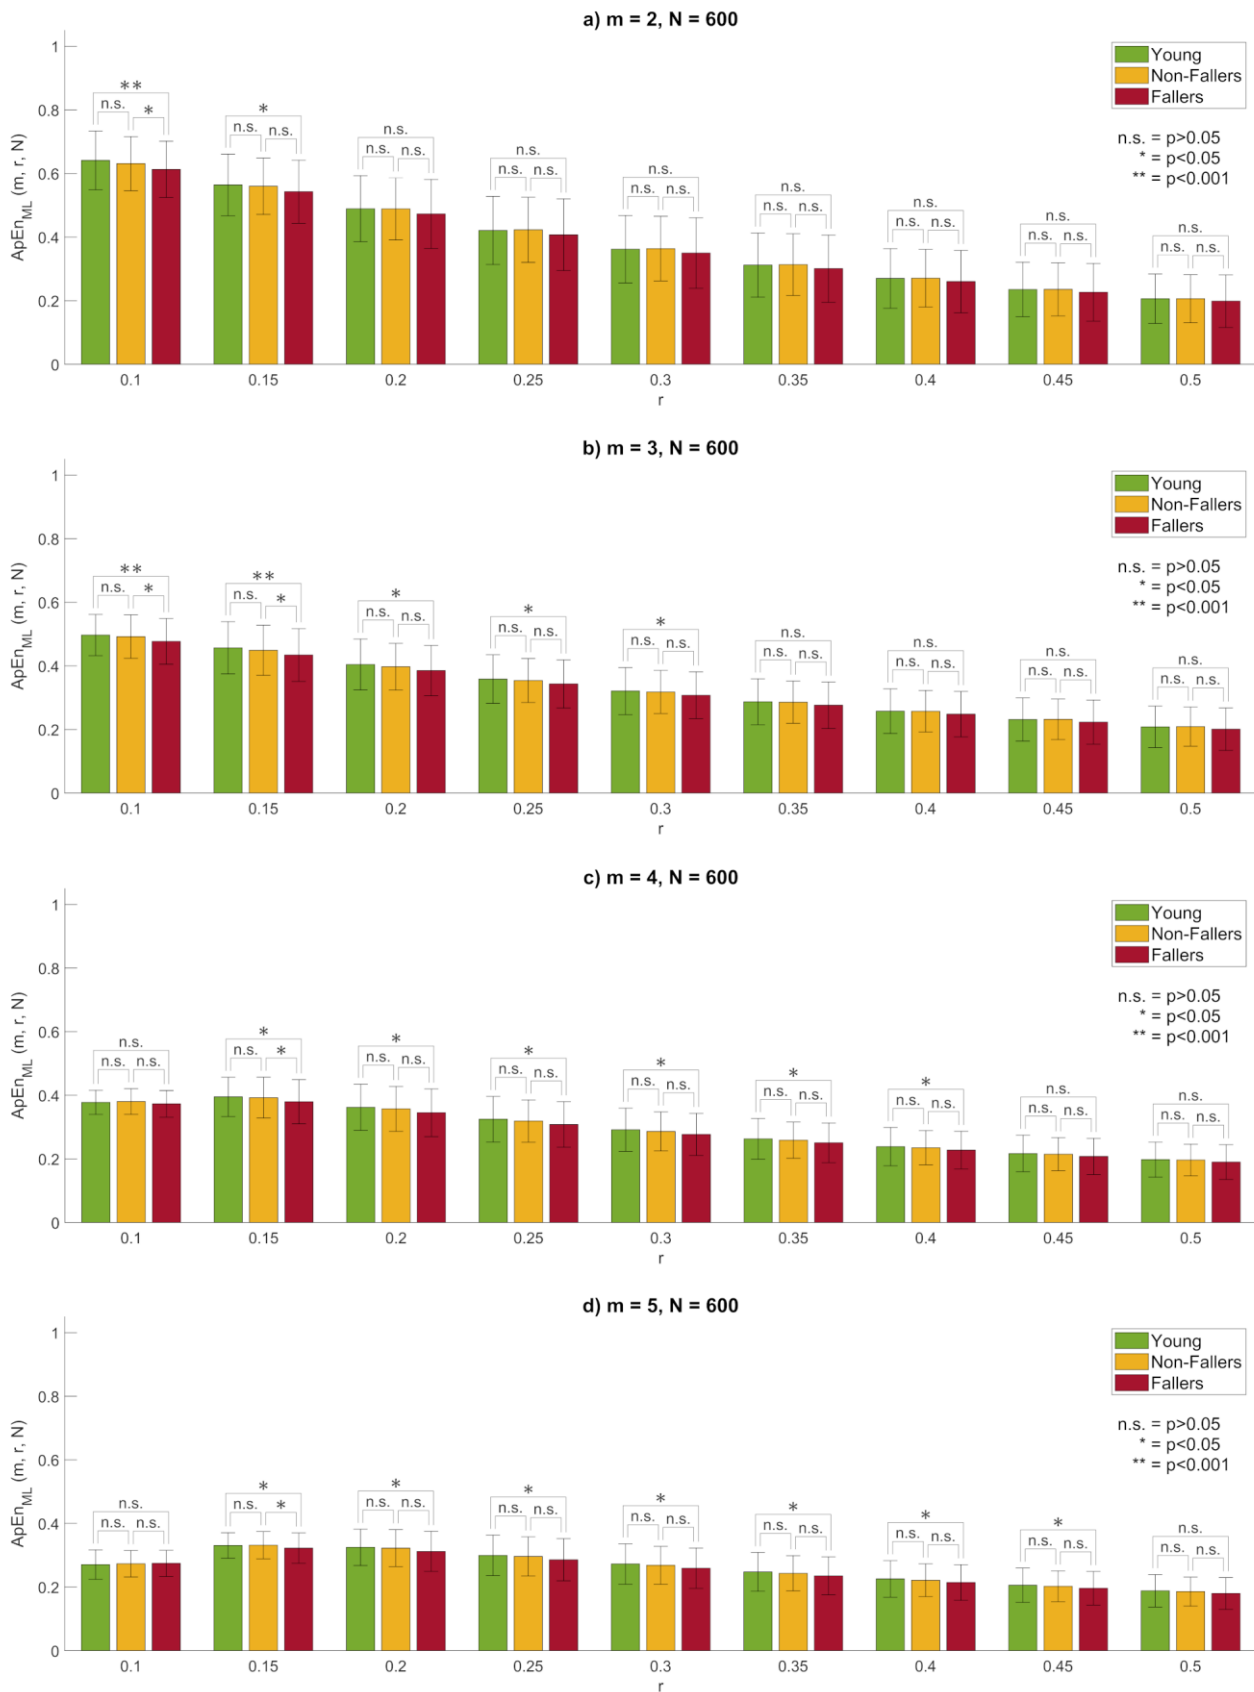

**Fig. S4** Approximate entropy (ApEn) mean value (bars) and standard deviation (error lines) by group as a function of  $r$  for  $m = \{2, 3, 4, 5\}$  (from top to bottom) and  $N = 600$  (i.e. 30 seconds) for the medial-lateral (ML) component of the centre of pressure displacement during quiet standing.

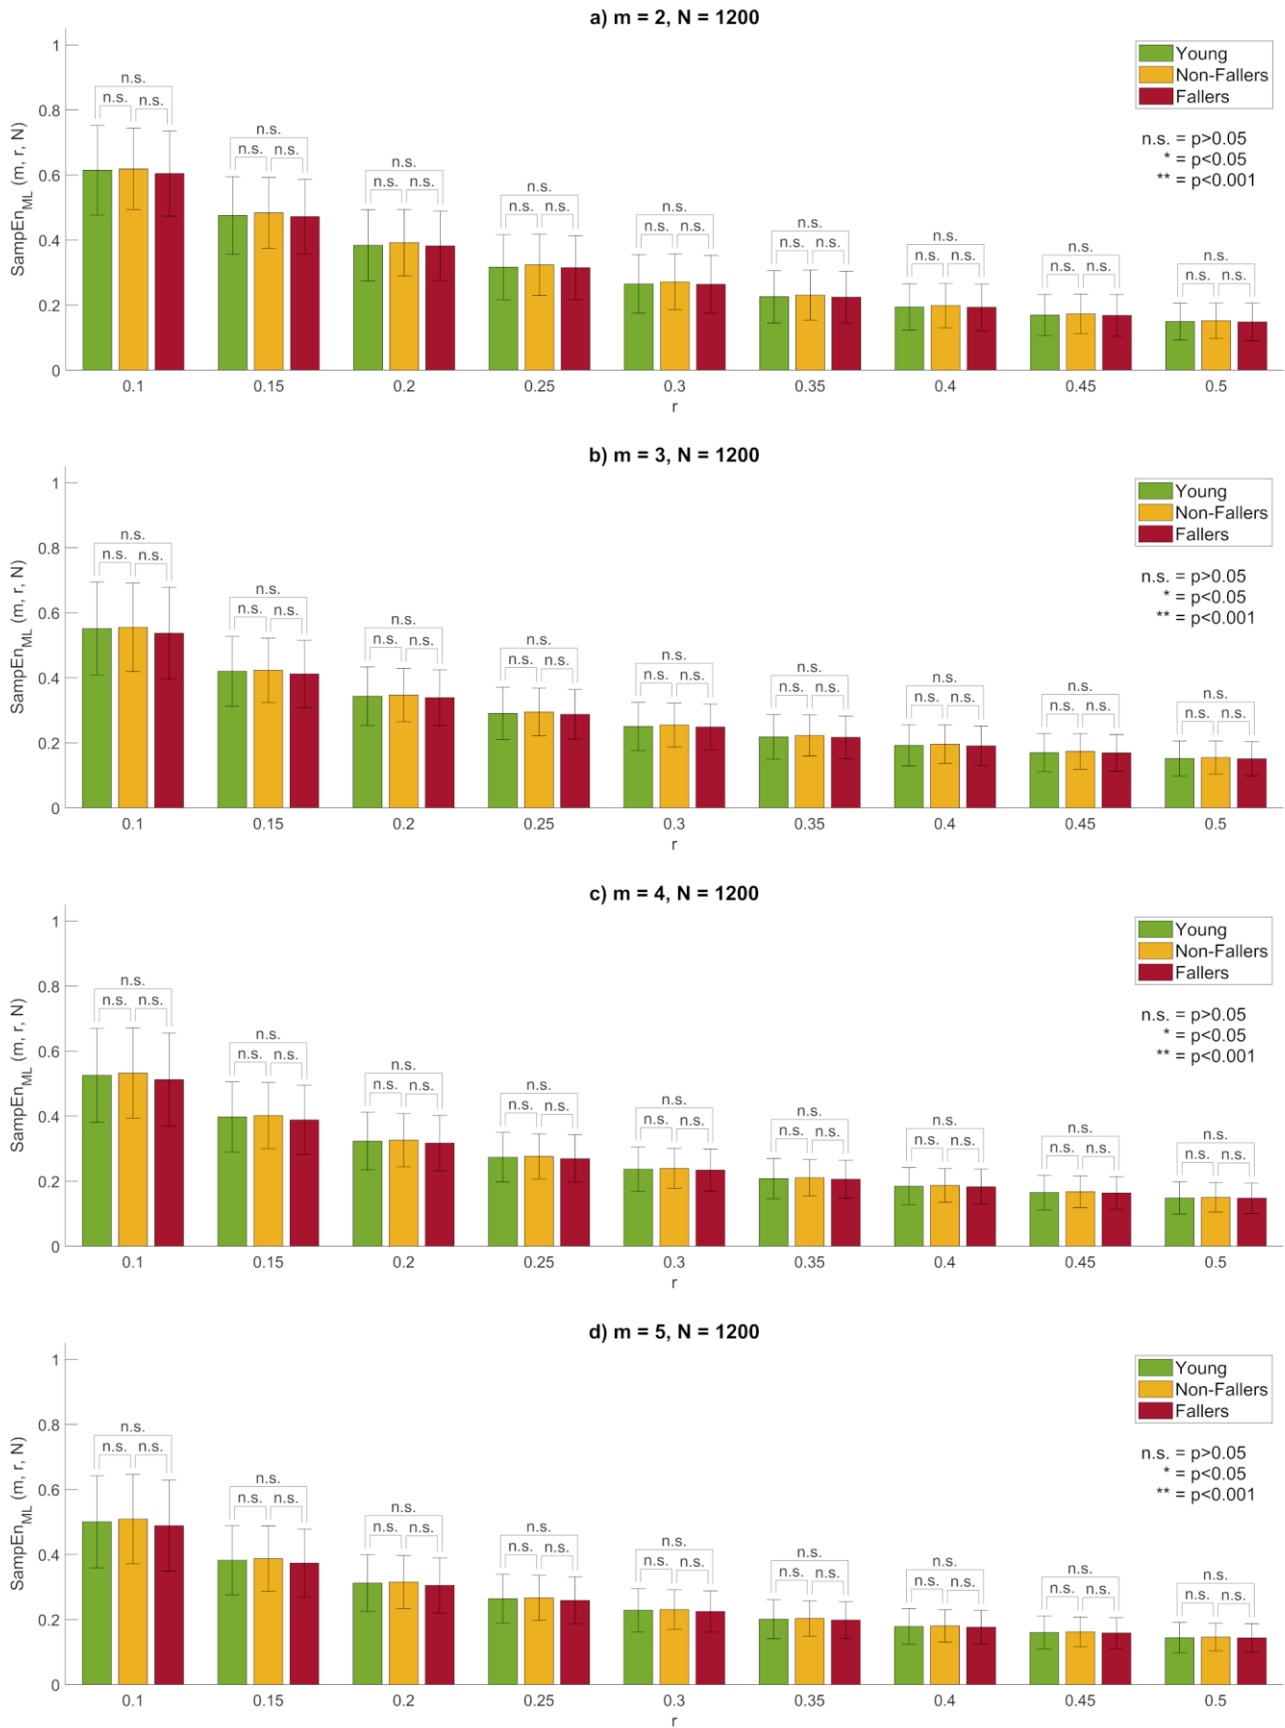

**Fig. S5** Sample entropy (SampEn) mean value (bars) and standard deviation (error lines) by group as a function of  $r$  for  $m = \{2, 3, 4, 5\}$  (from top to bottom) and  $N = 1200$  (i.e. 60 seconds) for the medial-lateral (ML) component of the centre of pressure displacement during quiet standing.

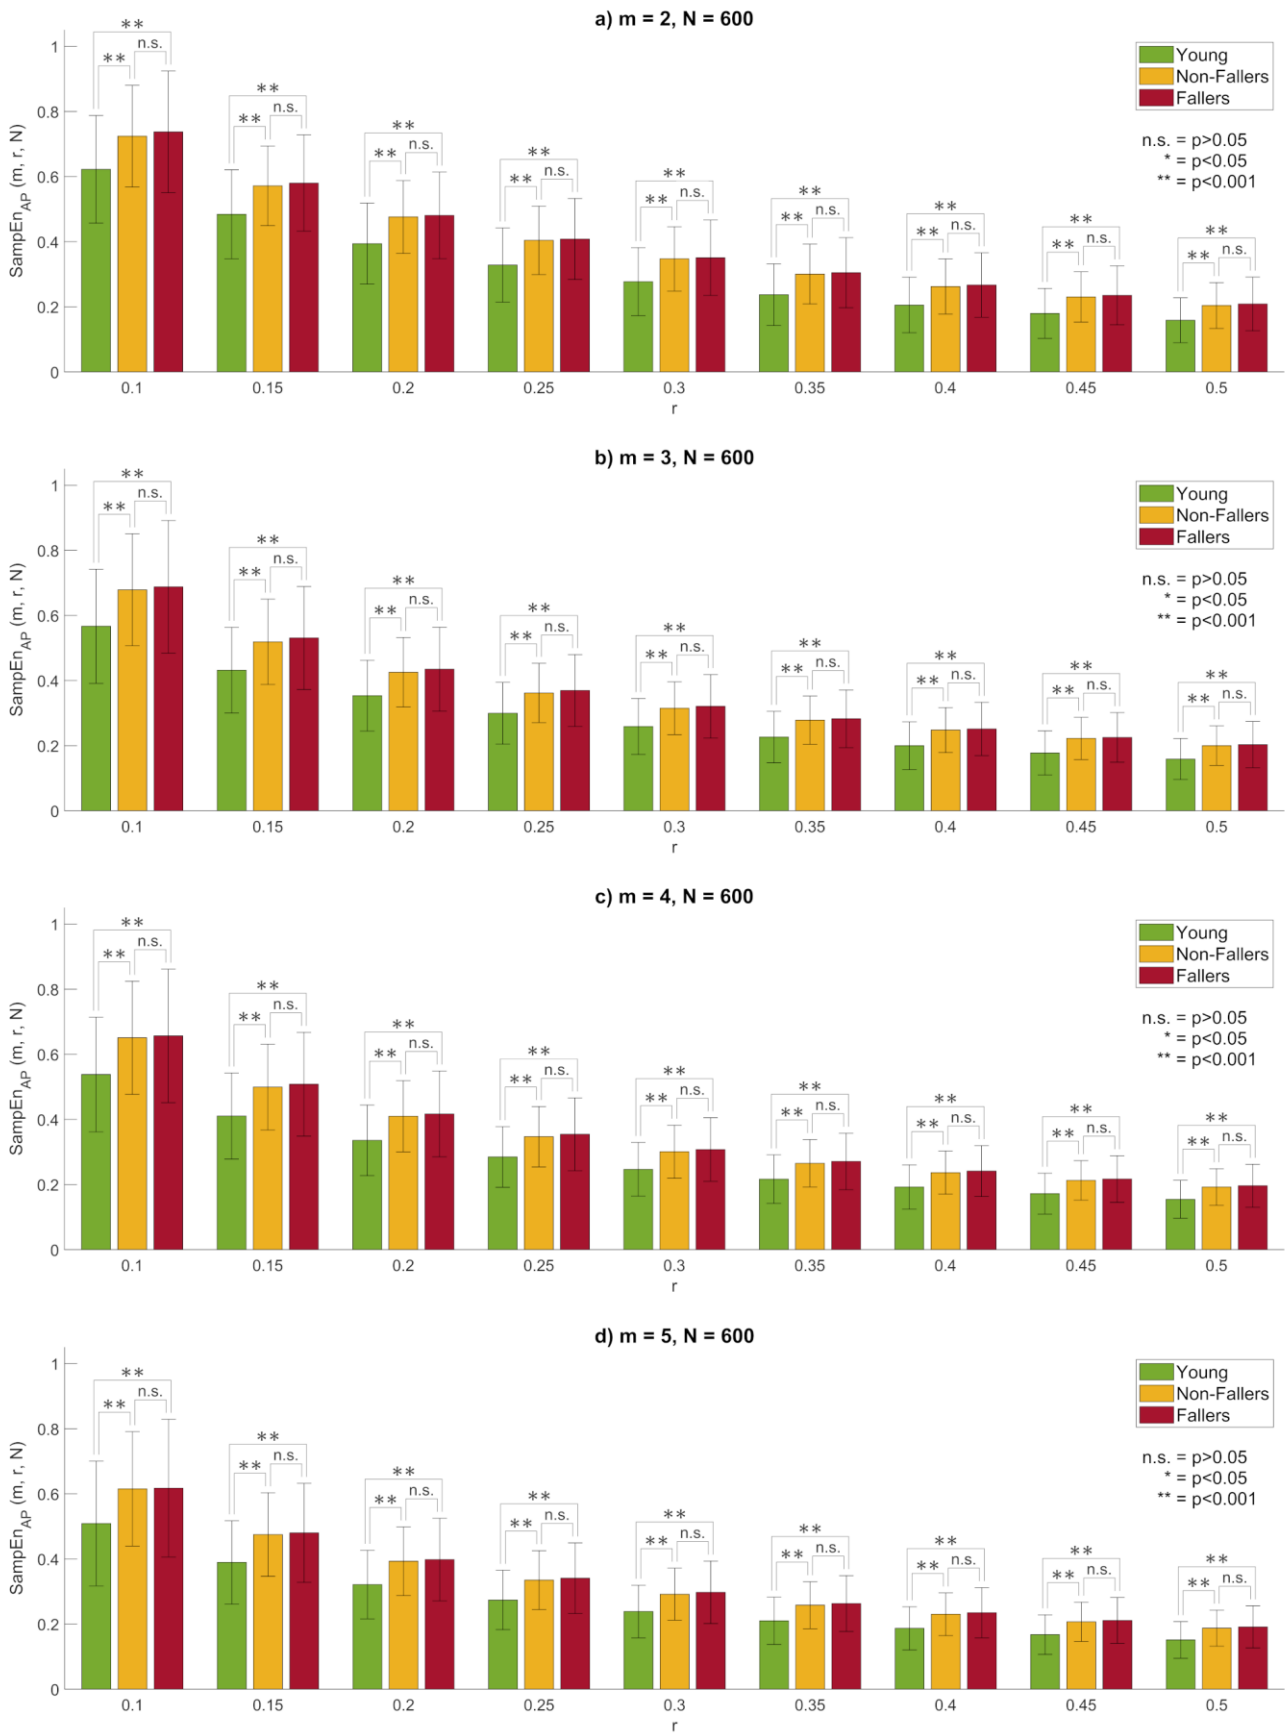

**Fig. S6** Sample entropy (SampEn) mean value (bars) and standard deviation (error lines) by group as a function of  $r$  for  $m = \{2, 3, 4, 5\}$  (from top to bottom) and  $N = 600$  (i.e. 30 seconds) for the anterior-posterior (AP) component of the centre of pressure displacement during quiet standing.

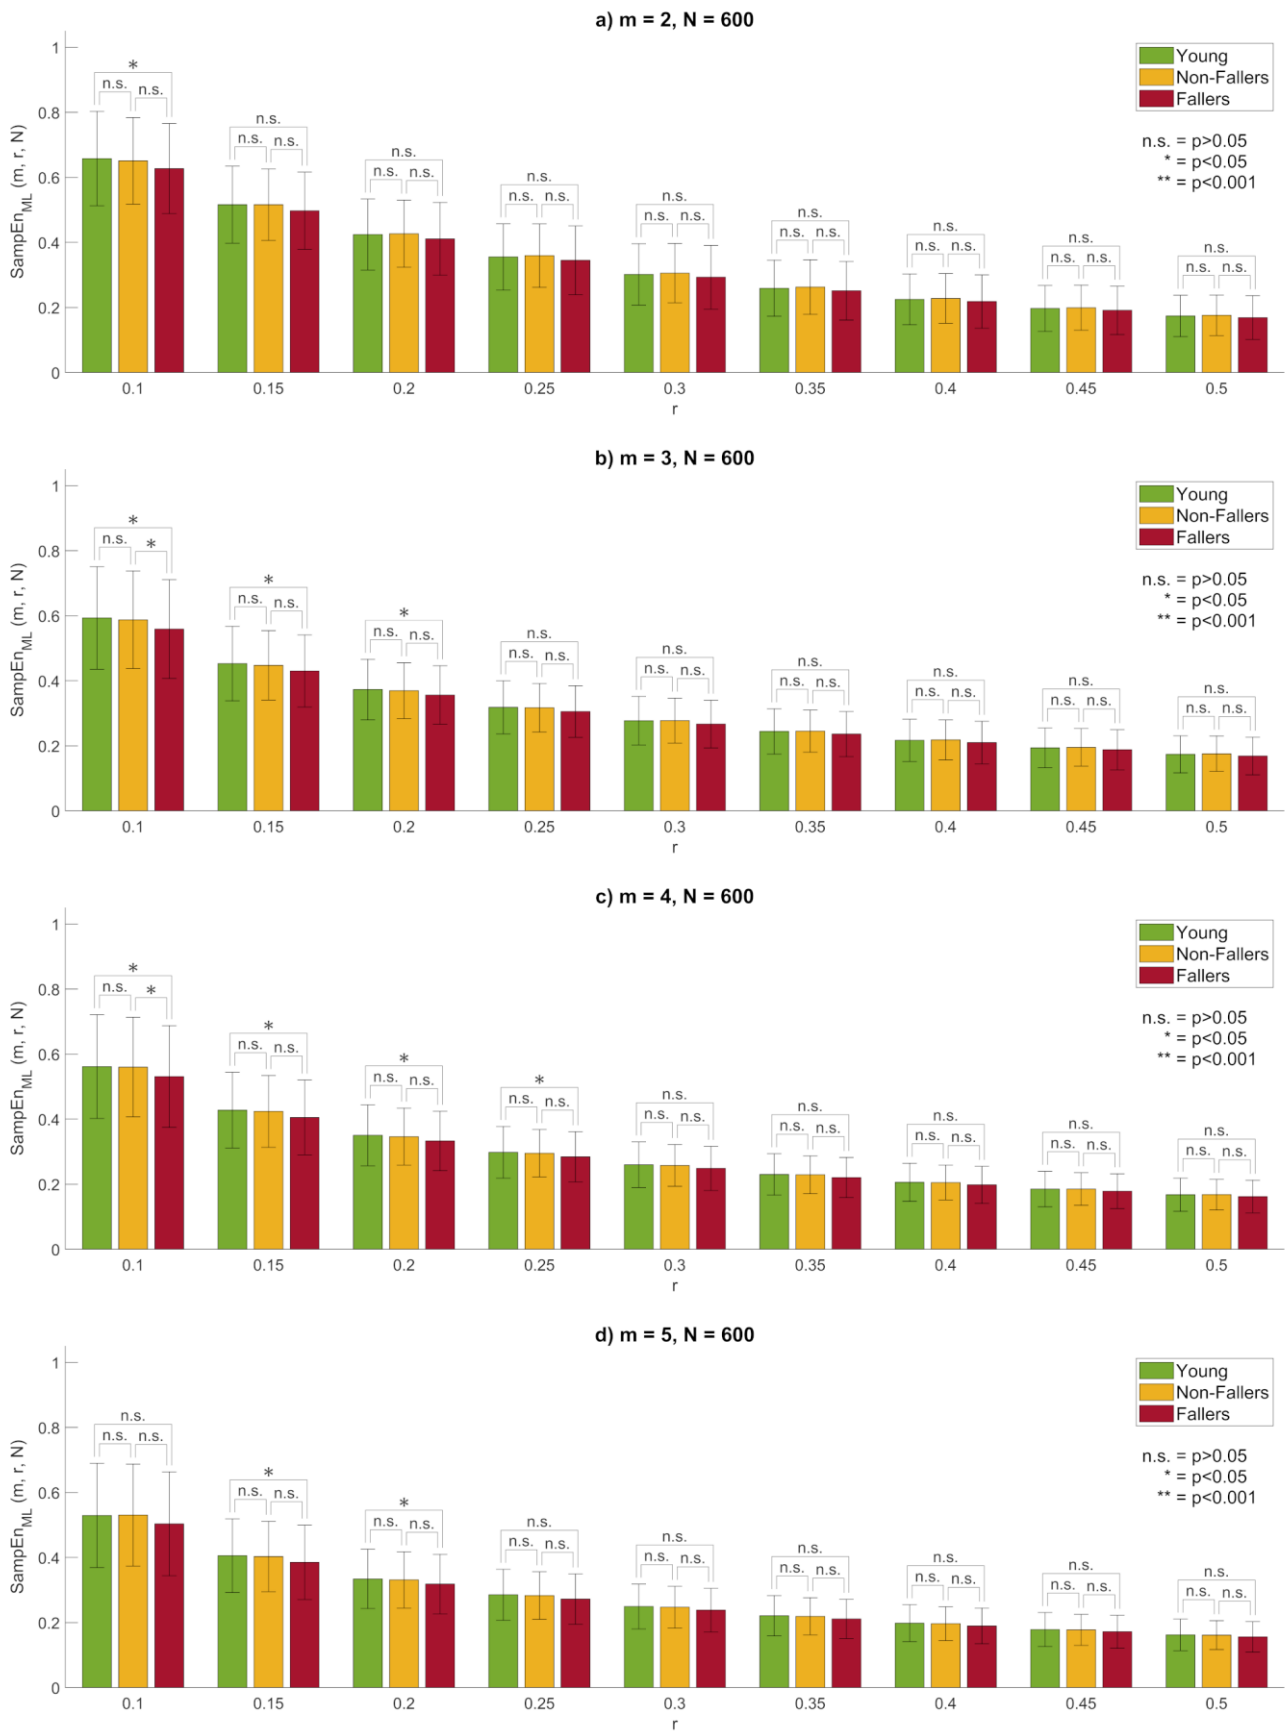

**Fig. S7** Sample entropy (SampEn) mean value (bars) and standard deviation (error lines) by group as a function of  $r$  for  $m = \{2, 3, 4, 5\}$  (from top to bottom) and  $N = 600$  (i.e. 30 seconds) for the medial-lateral (ML) component of the centre of pressure displacement during quiet standing.
