# Supplementary material for: On the use of approximate entropy and sample entropy with centre of pressure time-series
Source: Springer Nature journal article supplement (doi:10.1186/s12984-018-0465-9), 2018-12-01
Supplement: MOESM2 [file 16336920]

**Table S2** Approximate entropy in the medial-lateral direction as a function of  $r$  and  $m$  for a data length of  $N=1200$  (i.e. 60-seconds).

| $r$                       | One-way ANOVA |              | Descriptive statistics by group |       |                  |       |             |       | Post-hoc |              |        |              |        |              |
|---------------------------|---------------|--------------|---------------------------------|-------|------------------|-------|-------------|-------|----------|--------------|--------|--------------|--------|--------------|
|                           | F             | p-value      | Young (Y)                       |       | Non-Fallers (NF) |       | Fallers (F) |       | NF - Y   |              | F - Y  |              | F - NF |              |
|                           |               |              | Mean                            | SD    | Mean             | SD    | Mean        | SD    | MD       | p-value      | MD     | p-value      | MD     | p-value      |
| <b><math>m = 2</math></b> |               |              |                                 |       |                  |       |             |       |          |              |        |              |        |              |
| 0.1                       | 2.21          | 0.110        | 0.656                           | 0.111 | 0.651            | 0.098 | 0.639       | 0.104 | -0.005   | 0.660        | -0.017 | 0.096        | -0.012 | 0.324        |
| 0.15                      | 1.05          | 0.349        | 0.548                           | 0.113 | 0.550            | 0.102 | 0.538       | 0.110 | 0.002    | 0.898        | -0.010 | 0.442        | -0.012 | 0.317        |
| 0.2                       | 0.97          | 0.380        | 0.458                           | 0.116 | 0.463            | 0.108 | 0.451       | 0.116 | 0.005    | 0.638        | -0.007 | 0.713        | -0.012 | 0.382        |
| 0.25                      | 0.97          | 0.378        | 0.384                           | 0.114 | 0.389            | 0.108 | 0.378       | 0.116 | 0.006    | 0.577        | -0.006 | 0.776        | -0.011 | 0.405        |
| 0.3                       | 0.87          | 0.419        | 0.323                           | 0.107 | 0.328            | 0.102 | 0.318       | 0.110 | 0.005    | 0.611        | -0.005 | 0.798        | -0.010 | 0.447        |
| 0.35                      | 0.73          | 0.481        | 0.273                           | 0.098 | 0.278            | 0.094 | 0.269       | 0.102 | 0.004    | 0.657        | -0.004 | 0.832        | -0.008 | 0.510        |
| 0.4                       | 0.61          | 0.541        | 0.234                           | 0.088 | 0.237            | 0.085 | 0.230       | 0.093 | 0.003    | 0.709        | -0.004 | 0.850        | -0.007 | 0.564        |
| 0.45                      | 0.49          | 0.612        | 0.202                           | 0.078 | 0.205            | 0.076 | 0.199       | 0.084 | 0.003    | 0.742        | -0.003 | 0.895        | -0.005 | 0.643        |
| 0.5                       | 0.40          | 0.673        | 0.176                           | 0.069 | 0.179            | 0.067 | 0.174       | 0.076 | 0.002    | 0.772        | -0.002 | 0.928        | -0.004 | 0.711        |
| <b><math>m = 3</math></b> |               |              |                                 |       |                  |       |             |       |          |              |        |              |        |              |
| 0.1                       | 3.14          | <b>0.043</b> | 0.542                           | 0.094 | 0.540            | 0.093 | 0.524       | 0.095 | -0.002   | 0.889        | -0.018 | <b>0.033</b> | -0.016 | 0.090        |
| 0.15                      | 2.30          | 0.100        | 0.459                           | 0.095 | 0.455            | 0.087 | 0.444       | 0.092 | -0.003   | 0.738        | -0.015 | 0.082        | -0.011 | 0.256        |
| 0.2                       | 1.20          | 0.303        | 0.392                           | 0.087 | 0.390            | 0.078 | 0.382       | 0.084 | -0.002   | 0.916        | -0.010 | 0.269        | -0.008 | 0.437        |
| 0.25                      | 0.74          | 0.477        | 0.341                           | 0.082 | 0.341            | 0.074 | 0.334       | 0.080 | 0        | 0.999        | -0.007 | 0.476        | -0.007 | 0.488        |
| 0.3                       | 0.62          | 0.536        | 0.299                           | 0.079 | 0.300            | 0.072 | 0.294       | 0.077 | 0.002    | 0.913        | -0.005 | 0.642        | -0.007 | 0.504        |
| 0.35                      | 0.65          | 0.520        | 0.263                           | 0.076 | 0.266            | 0.070 | 0.259       | 0.075 | 0.002    | 0.798        | -0.004 | 0.735        | -0.007 | 0.501        |
| 0.4                       | 0.68          | 0.509        | 0.233                           | 0.073 | 0.236            | 0.068 | 0.229       | 0.073 | 0.003    | 0.735        | -0.004 | 0.784        | -0.006 | 0.509        |
| 0.45                      | 0.70          | 0.498        | 0.207                           | 0.069 | 0.209            | 0.065 | 0.204       | 0.069 | 0.003    | 0.694        | -0.003 | 0.813        | -0.006 | 0.513        |
| 0.5                       | 0.66          | 0.515        | 0.184                           | 0.064 | 0.187            | 0.061 | 0.181       | 0.065 | 0.003    | 0.693        | -0.003 | 0.835        | -0.005 | 0.537        |
| <b><math>m = 4</math></b> |               |              |                                 |       |                  |       |             |       |          |              |        |              |        |              |
| 0.1                       | 3.26          | <b>0.039</b> | 0.458                           | 0.060 | 0.462            | 0.063 | 0.450       | 0.064 | 0.004    | 0.336        | -0.008 | 0.211        | -0.012 | <b>0.033</b> |
| 0.15                      | 2.34          | 0.096        | 0.417                           | 0.084 | 0.416            | 0.082 | 0.403       | 0.085 | 0        | 0.998        | -0.013 | 0.089        | -0.013 | 0.118        |
| 0.2                       | 1.82          | 0.163        | 0.361                           | 0.083 | 0.359            | 0.077 | 0.349       | 0.082 | -0.002   | 0.882        | -0.012 | 0.137        | -0.010 | 0.280        |
| 0.25                      | 1.31          | 0.269        | 0.314                           | 0.077 | 0.312            | 0.069 | 0.305       | 0.075 | -0.002   | 0.831        | -0.009 | 0.241        | -0.007 | 0.468        |
| 0.3                       | 0.87          | 0.419        | 0.277                           | 0.071 | 0.276            | 0.063 | 0.270       | 0.069 | -0.001   | 0.932        | -0.007 | 0.385        | -0.006 | 0.554        |
| 0.35                      | 0.61          | 0.543        | 0.246                           | 0.066 | 0.246            | 0.059 | 0.241       | 0.064 | 0        | 0.995        | -0.005 | 0.521        | -0.005 | 0.590        |
| 0.4                       | 0.47          | 0.627        | 0.221                           | 0.063 | 0.221            | 0.056 | 0.217       | 0.061 | 0.001    | 0.983        | -0.004 | 0.658        | -0.004 | 0.612        |
| 0.45                      | 0.44          | 0.645        | 0.198                           | 0.059 | 0.200            | 0.054 | 0.195       | 0.058 | 0.001    | 0.920        | -0.003 | 0.751        | -0.004 | 0.618        |
| 0.5                       | 0.46          | 0.633        | 0.179                           | 0.056 | 0.181            | 0.051 | 0.177       | 0.055 | 0.001    | 0.861        | -0.003 | 0.799        | -0.004 | 0.615        |
| <b><math>m = 5</math></b> |               |              |                                 |       |                  |       |             |       |          |              |        |              |        |              |
| 0.1                       | 4.98          | <b>0.007</b> | 0.367                           | 0.039 | 0.373            | 0.039 | 0.365       | 0.040 | 0.006    | <b>0.013</b> | -0.002 | 0.814        | -0.007 | <b>0.046</b> |
| 0.15                      | 2.63          | 0.072        | 0.374                           | 0.064 | 0.377            | 0.064 | 0.365       | 0.066 | 0.003    | 0.654        | -0.009 | 0.164        | -0.012 | 0.057        |
| 0.2                       | 1.88          | 0.153        | 0.337                           | 0.074 | 0.337            | 0.071 | 0.327       | 0.074 | 0        | 1            | -0.010 | 0.146        | -0.010 | 0.173        |
| 0.25                      | 1.47          | 0.230        | 0.298                           | 0.073 | 0.297            | 0.068 | 0.289       | 0.072 | -0.001   | 0.949        | -0.009 | 0.202        | -0.008 | 0.320        |
| 0.3                       | 1.21          | 0.300        | 0.264                           | 0.068 | 0.263            | 0.062 | 0.256       | 0.067 | -0.001   | 0.902        | -0.008 | 0.266        | -0.006 | 0.446        |
| 0.35                      | 0.93          | 0.396        | 0.235                           | 0.064 | 0.234            | 0.057 | 0.229       | 0.061 | -0.001   | 0.926        | -0.006 | 0.362        | -0.005 | 0.535        |
| 0.4                       | 0.60          | 0.547        | 0.211                           | 0.059 | 0.211            | 0.053 | 0.207       | 0.057 | -0.001   | 0.975        | -0.005 | 0.516        | -0.004 | 0.631        |
| 0.45                      | 0.44          | 0.645        | 0.191                           | 0.055 | 0.191            | 0.049 | 0.187       | 0.054 | 0        | 0.999        | -0.004 | 0.630        | -0.004 | 0.676        |
| 0.5                       | 0.33          | 0.717        | 0.173                           | 0.052 | 0.173            | 0.047 | 0.170       | 0.051 | 0        | 0.991        | -0.003 | 0.738        | -0.003 | 0.707        |

$F$  F-statistic,  $SD$  standard deviation,  $MD$  mean difference

Bold values indicate significant differences

Table S3 Approximate entropy in the anterior-posterior direction as a function of  $r$  and  $m$  for a data length of  $N=600$  (i.e. 30-seconds).

| $r$                       | One-way ANOVA |         | Descriptive statistics by group |       |                  |       |             |       | Post-hoc |              |        |              |        |              |
|---------------------------|---------------|---------|---------------------------------|-------|------------------|-------|-------------|-------|----------|--------------|--------|--------------|--------|--------------|
|                           | F             | p-value | Young (Y)                       |       | Non-Fallers (NF) |       | Fallers (F) |       | NF - Y   |              | F - Y  |              | F - NF |              |
|                           |               |         | Mean                            | SD    | Mean             | SD    | Mean        | SD    | MD       | p-value      | MD     | p-value      | MD     | p-value      |
| <b><math>m = 2</math></b> |               |         |                                 |       |                  |       |             |       |          |              |        |              |        |              |
| 0.1                       | 74.40         | <0.001  | 0.619                           | 0.106 | 0.676            | 0.095 | 0.678       | 0.112 | 0.057    | <0.001       | 0.060  | <0.001       | 0.003  | 0.949        |
| 0.15                      | 88.83         | <0.001  | 0.535                           | 0.116 | 0.602            | 0.096 | 0.604       | 0.114 | 0.066    | <0.001       | 0.068  | <0.001       | 0.002  | 0.969        |
| 0.2                       | 96.40         | <0.001  | 0.457                           | 0.123 | 0.530            | 0.101 | 0.532       | 0.121 | 0.073    | <0.001       | 0.075  | <0.001       | 0.002  | 0.979        |
| 0.25                      | 99.33         | <0.001  | 0.388                           | 0.124 | 0.464            | 0.106 | 0.467       | 0.125 | 0.076    | <0.001       | 0.079  | <0.001       | 0.003  | 0.949        |
| 0.3                       | 100.93        | <0.001  | 0.331                           | 0.119 | 0.405            | 0.107 | 0.409       | 0.124 | 0.075    | <0.001       | 0.078  | <0.001       | 0.003  | 0.924        |
| 0.35                      | 101.02        | <0.001  | 0.283                           | 0.112 | 0.353            | 0.103 | 0.358       | 0.120 | 0.071    | <0.001       | 0.075  | <0.001       | 0.005  | 0.845        |
| 0.4                       | 100.23        | <0.001  | 0.243                           | 0.102 | 0.308            | 0.098 | 0.314       | 0.114 | 0.065    | <0.001       | 0.071  | <0.001       | 0.006  | 0.744        |
| 0.45                      | 98.87         | <0.001  | 0.211                           | 0.093 | 0.270            | 0.091 | 0.277       | 0.107 | 0.059    | <0.001       | 0.066  | <0.001       | 0.007  | 0.610        |
| 0.5                       | 98.33         | <0.001  | 0.185                           | 0.084 | 0.238            | 0.083 | 0.246       | 0.099 | 0.053    | <0.001       | 0.061  | <0.001       | 0.008  | 0.488        |
| <b><math>m = 3</math></b> |               |         |                                 |       |                  |       |             |       |          |              |        |              |        |              |
| 0.1                       | 70.06         | <0.001  | 0.487                           | 0.076 | 0.528            | 0.062 | 0.517       | 0.073 | 0.041    | <0.001       | 0.030  | <0.001       | -0.010 | 0.148        |
| 0.15                      | 94.52         | <0.001  | 0.442                           | 0.096 | 0.502            | 0.090 | 0.504       | 0.107 | 0.060    | <0.001       | 0.062  | <0.001       | 0.002  | 0.970        |
| 0.2                       | 92.44         | <0.001  | 0.388                           | 0.096 | 0.446            | 0.090 | 0.452       | 0.108 | 0.058    | <0.001       | 0.064  | <0.001       | 0.006  | 0.689        |
| 0.25                      | 93.34         | <0.001  | 0.340                           | 0.092 | 0.395            | 0.083 | 0.402       | 0.101 | 0.055    | <0.001       | 0.061  | <0.001       | 0.007  | 0.611        |
| 0.3                       | 94.93         | <0.001  | 0.300                           | 0.088 | 0.353            | 0.078 | 0.359       | 0.095 | 0.053    | <0.001       | 0.059  | <0.001       | 0.006  | 0.648        |
| 0.35                      | 97.34         | <0.001  | 0.266                           | 0.085 | 0.317            | 0.075 | 0.322       | 0.089 | 0.052    | <0.001       | 0.056  | <0.001       | 0.005  | 0.764        |
| 0.4                       | 98.18         | <0.001  | 0.237                           | 0.082 | 0.286            | 0.072 | 0.290       | 0.085 | 0.050    | <0.001       | 0.053  | <0.001       | 0.004  | 0.836        |
| 0.45                      | 98.11         | <0.001  | 0.211                           | 0.078 | 0.259            | 0.070 | 0.262       | 0.082 | 0.048    | <0.001       | 0.051  | <0.001       | 0.004  | 0.823        |
| 0.5                       | 98.05         | <0.001  | 0.189                           | 0.074 | 0.234            | 0.067 | 0.238       | 0.078 | 0.045    | <0.001       | 0.049  | <0.001       | 0.004  | 0.783        |
| <b><math>m = 4</math></b> |               |         |                                 |       |                  |       |             |       |          |              |        |              |        |              |
| 0.1                       | 8.86          | <0.001  | 0.377                           | 0.045 | 0.383            | 0.043 | 0.369       | 0.050 | 0.006    | <b>0.011</b> | -0.007 | 0.070        | -0.014 | <0.001       |
| 0.15                      | 94.50         | <0.001  | 0.386                           | 0.074 | 0.432            | 0.062 | 0.425       | 0.074 | 0.046    | <0.001       | 0.039  | <0.001       | -0.007 | 0.440        |
| 0.2                       | 101.23        | <0.001  | 0.351                           | 0.085 | 0.407            | 0.080 | 0.406       | 0.093 | 0.055    | <0.001       | 0.055  | <0.001       | 0      | 0.998        |
| 0.25                      | 96.17         | <0.001  | 0.313                           | 0.085 | 0.366            | 0.081 | 0.370       | 0.096 | 0.053    | <0.001       | 0.057  | <0.001       | 0.004  | 0.825        |
| 0.3                       | 93            | <0.001  | 0.279                           | 0.081 | 0.328            | 0.077 | 0.334       | 0.091 | 0.049    | <0.001       | 0.055  | <0.001       | 0.006  | 0.646        |
| 0.35                      | 94.25         | <0.001  | 0.249                           | 0.077 | 0.295            | 0.072 | 0.301       | 0.085 | 0.047    | <0.001       | 0.052  | <0.001       | 0.006  | 0.602        |
| 0.4                       | 95.30         | <0.001  | 0.223                           | 0.072 | 0.267            | 0.067 | 0.272       | 0.079 | 0.044    | <0.001       | 0.049  | <0.001       | 0.005  | 0.622        |
| 0.45                      | 95.05         | <0.001  | 0.201                           | 0.068 | 0.243            | 0.063 | 0.248       | 0.074 | 0.041    | <0.001       | 0.046  | <0.001       | 0.005  | 0.635        |
| 0.5                       | 95.07         | <0.001  | 0.182                           | 0.065 | 0.221            | 0.059 | 0.226       | 0.070 | 0.039    | <0.001       | 0.044  | <0.001       | 0.005  | 0.612        |
| <b><math>m = 5</math></b> |               |         |                                 |       |                  |       |             |       |          |              |        |              |        |              |
| 0.1                       | 48.65         | <0.001  | 0.276                           | 0.048 | 0.256            | 0.056 | 0.245       | 0.064 | -0.020   | <0.001       | -0.031 | <0.001       | -0.011 | <b>0.022</b> |
| 0.15                      | 55.71         | <0.001  | 0.324                           | 0.049 | 0.348            | 0.037 | 0.336       | 0.045 | 0.023    | <0.001       | 0.011  | <b>0.002</b> | -0.012 | <b>0.002</b> |
| 0.2                       | 101.59        | <0.001  | 0.315                           | 0.067 | 0.359            | 0.058 | 0.352       | 0.067 | 0.044    | <0.001       | 0.037  | <0.001       | -0.007 | 0.363        |
| 0.25                      | 100.98        | <0.001  | 0.290                           | 0.075 | 0.338            | 0.069 | 0.336       | 0.080 | 0.048    | <0.001       | 0.047  | <0.001       | -0.001 | 0.966        |
| 0.3                       | 94.79         | <0.001  | 0.262                           | 0.075 | 0.309            | 0.070 | 0.311       | 0.082 | 0.047    | <0.001       | 0.049  | <0.001       | 0.002  | 0.928        |
| 0.35                      | 94.20         | <0.001  | 0.236                           | 0.072 | 0.281            | 0.068 | 0.285       | 0.080 | 0.044    | <0.001       | 0.048  | <0.001       | 0.004  | 0.774        |
| 0.4                       | 94.45         | <0.001  | 0.213                           | 0.068 | 0.255            | 0.065 | 0.260       | 0.076 | 0.042    | <0.001       | 0.046  | <0.001       | 0.004  | 0.686        |
| 0.45                      | 94.46         | <0.001  | 0.193                           | 0.064 | 0.233            | 0.061 | 0.237       | 0.072 | 0.039    | <0.001       | 0.044  | <0.001       | 0.005  | 0.623        |
| 0.5                       | 94.15         | <0.001  | 0.176                           | 0.061 | 0.213            | 0.057 | 0.217       | 0.067 | 0.037    | <0.001       | 0.042  | <0.001       | 0.005  | 0.573        |

F F-statistic, SD standard deviation, MD mean difference

Bold values indicate significant differences

Table S4 Approximate entropy in the medial-lateral direction as a function of  $r$  and  $m$  for a data length of  $N=600$  (i.e. 30-seconds).

| $r$                       | One-way ANOVA |              | Descriptive statistics by group |       |                  |       |             |       | Post-hoc |         |        |              |        |              |
|---------------------------|---------------|--------------|---------------------------------|-------|------------------|-------|-------------|-------|----------|---------|--------|--------------|--------|--------------|
|                           | F             | p-value      | Young (Y)                       |       | Non-Fallers (NF) |       | Fallers (F) |       | NF - Y   |         | F - Y  |              | F - NF |              |
|                           |               |              | Mean                            | SD    | Mean             | SD    | Mean        | SD    | MD       | p-value | MD     | p-value      | MD     | p-value      |
| <b><math>m = 2</math></b> |               |              |                                 |       |                  |       |             |       |          |         |        |              |        |              |
| 0.1                       | 9.49          | <0.001       | 0.641                           | 0.092 | 0.631            | 0.085 | 0.613       | 0.089 | -0.010   | 0.059   | -0.028 | <0.001       | -0.018 | <b>0.028</b> |
| 0.15                      | 4.57          | <b>0.010</b> | 0.564                           | 0.097 | 0.560            | 0.089 | 0.543       | 0.099 | -0.004   | 0.656   | -0.021 | <b>0.007</b> | -0.017 | 0.051        |
| 0.2                       | 2.35          | 0.095        | 0.489                           | 0.104 | 0.489            | 0.098 | 0.473       | 0.109 | 0        | 0.996   | -0.016 | 0.087        | -0.016 | 0.120        |
| 0.25                      | 1.77          | 0.170        | 0.421                           | 0.107 | 0.423            | 0.102 | 0.407       | 0.113 | 0.002    | 0.927   | -0.013 | 0.210        | -0.015 | 0.154        |
| 0.3                       | 1.47          | 0.230        | 0.362                           | 0.106 | 0.364            | 0.102 | 0.350       | 0.111 | 0.002    | 0.939   | -0.012 | 0.274        | -0.014 | 0.211        |
| 0.35                      | 1.33          | 0.265        | 0.312                           | 0.101 | 0.313            | 0.097 | 0.301       | 0.106 | 0.001    | 0.964   | -0.011 | 0.298        | -0.012 | 0.252        |
| 0.4                       | 1.15          | 0.318        | 0.270                           | 0.094 | 0.271            | 0.091 | 0.260       | 0.098 | 0.001    | 0.991   | -0.010 | 0.329        | -0.011 | 0.319        |
| 0.45                      | 1.02          | 0.361        | 0.235                           | 0.086 | 0.235            | 0.083 | 0.226       | 0.091 | 0        | 0.997   | -0.009 | 0.363        | -0.009 | 0.371        |
| 0.5                       | 0.94          | 0.392        | 0.206                           | 0.078 | 0.206            | 0.076 | 0.199       | 0.083 | 0        | 0.999   | -0.008 | 0.377        | -0.008 | 0.425        |
| <b><math>m = 3</math></b> |               |              |                                 |       |                  |       |             |       |          |         |        |              |        |              |
| 0.1                       | 7.89          | <0.001       | 0.497                           | 0.065 | 0.492            | 0.068 | 0.477       | 0.072 | -0.005   | 0.325   | -0.020 | <0.001       | -0.015 | <b>0.011</b> |
| 0.15                      | 7.34          | <b>0.001</b> | 0.457                           | 0.082 | 0.449            | 0.079 | 0.434       | 0.083 | -0.008   | 0.148   | -0.023 | <b>0.001</b> | -0.015 | <b>0.046</b> |
| 0.2                       | 5.91          | <b>0.003</b> | 0.404                           | 0.080 | 0.397            | 0.073 | 0.385       | 0.079 | -0.007   | 0.164   | -0.019 | <b>0.003</b> | -0.012 | 0.112        |
| 0.25                      | 3.91          | <b>0.020</b> | 0.358                           | 0.076 | 0.354            | 0.069 | 0.343       | 0.076 | -0.004   | 0.442   | -0.015 | <b>0.016</b> | -0.011 | 0.151        |
| 0.3                       | 2.89          | 0.056        | 0.321                           | 0.074 | 0.318            | 0.068 | 0.308       | 0.074 | -0.003   | 0.759   | -0.013 | <b>0.043</b> | -0.010 | 0.153        |
| 0.35                      | 2.13          | 0.119        | 0.287                           | 0.072 | 0.286            | 0.066 | 0.276       | 0.073 | -0.001   | 0.945   | -0.011 | 0.100        | -0.010 | 0.184        |
| 0.4                       | 1.73          | 0.177        | 0.258                           | 0.070 | 0.257            | 0.065 | 0.248       | 0.071 | 0        | 0.998   | -0.009 | 0.166        | -0.009 | 0.205        |
| 0.45                      | 1.53          | 0.217        | 0.232                           | 0.068 | 0.232            | 0.064 | 0.223       | 0.069 | 0        | 0.988   | -0.008 | 0.227        | -0.009 | 0.219        |
| 0.5                       | 1.33          | 0.264        | 0.208                           | 0.065 | 0.209            | 0.062 | 0.201       | 0.067 | 0.001    | 0.967   | -0.007 | 0.294        | -0.008 | 0.252        |
| <b><math>m = 4</math></b> |               |              |                                 |       |                  |       |             |       |          |         |        |              |        |              |
| 0.1                       | 2.87          | 0.057        | 0.378                           | 0.038 | 0.381            | 0.041 | 0.373       | 0.042 | 0.003    | 0.361   | -0.005 | 0.268        | -0.007 | 0.050        |
| 0.15                      | 5.09          | <b>0.006</b> | 0.395                           | 0.062 | 0.393            | 0.064 | 0.380       | 0.069 | -0.002   | 0.761   | -0.015 | <b>0.004</b> | -0.013 | <b>0.025</b> |
| 0.2                       | 5.28          | <b>0.005</b> | 0.362                           | 0.073 | 0.357            | 0.071 | 0.345       | 0.075 | -0.005   | 0.322   | -0.017 | <b>0.004</b> | -0.012 | 0.082        |
| 0.25                      | 5.23          | <b>0.005</b> | 0.325                           | 0.072 | 0.319            | 0.066 | 0.308       | 0.072 | -0.006   | 0.222   | -0.016 | <b>0.005</b> | -0.011 | 0.130        |
| 0.3                       | 4.68          | <b>0.009</b> | 0.292                           | 0.068 | 0.286            | 0.061 | 0.277       | 0.066 | -0.005   | 0.249   | -0.014 | <b>0.009</b> | -0.009 | 0.168        |
| 0.35                      | 3.94          | <b>0.020</b> | 0.263                           | 0.064 | 0.259            | 0.057 | 0.251       | 0.062 | -0.004   | 0.352   | -0.013 | <b>0.018</b> | -0.008 | 0.193        |
| 0.4                       | 3.25          | <b>0.039</b> | 0.239                           | 0.060 | 0.235            | 0.054 | 0.228       | 0.059 | -0.003   | 0.505   | -0.011 | <b>0.033</b> | -0.008 | 0.209        |
| 0.45                      | 2.45          | 0.087        | 0.217                           | 0.057 | 0.215            | 0.052 | 0.208       | 0.057 | -0.002   | 0.730   | -0.009 | 0.070        | -0.007 | 0.232        |
| 0.5                       | 1.90          | 0.150        | 0.198                           | 0.055 | 0.197            | 0.050 | 0.190       | 0.055 | -0.001   | 0.870   | -0.008 | 0.125        | -0.006 | 0.269        |
| <b><math>m = 5</math></b> |               |              |                                 |       |                  |       |             |       |          |         |        |              |        |              |
| 0.1                       | 1.18          | 0.309        | 0.271                           | 0.046 | 0.273            | 0.042 | 0.275       | 0.041 | 0.003    | 0.428   | 0.004  | 0.458        | 0.001  | 0.933        |
| 0.15                      | 3.88          | <b>0.021</b> | 0.331                           | 0.040 | 0.332            | 0.043 | 0.323       | 0.048 | 0.001    | 0.860   | -0.008 | <b>0.033</b> | -0.009 | <b>0.017</b> |
| 0.2                       | 4.24          | <b>0.014</b> | 0.325                           | 0.057 | 0.323            | 0.058 | 0.312       | 0.063 | -0.002   | 0.702   | -0.013 | <b>0.010</b> | -0.010 | 0.059        |
| 0.25                      | 4.02          | <b>0.018</b> | 0.299                           | 0.064 | 0.296            | 0.062 | 0.286       | 0.066 | -0.003   | 0.596   | -0.013 | <b>0.013</b> | -0.010 | 0.092        |
| 0.3                       | 4.24          | <b>0.015</b> | 0.273                           | 0.063 | 0.269            | 0.059 | 0.259       | 0.063 | -0.004   | 0.376   | -0.013 | <b>0.012</b> | -0.009 | 0.145        |
| 0.35                      | 4.20          | <b>0.015</b> | 0.248                           | 0.061 | 0.243            | 0.055 | 0.235       | 0.060 | -0.004   | 0.301   | -0.012 | <b>0.014</b> | -0.008 | 0.191        |
| 0.4                       | 4             | <b>0.018</b> | 0.226                           | 0.058 | 0.221            | 0.052 | 0.214       | 0.056 | -0.004   | 0.282   | -0.011 | <b>0.019</b> | -0.007 | 0.236        |
| 0.45                      | 3.21          | <b>0.041</b> | 0.206                           | 0.054 | 0.203            | 0.048 | 0.196       | 0.053 | -0.003   | 0.419   | -0.010 | <b>0.038</b> | -0.006 | 0.268        |
| 0.5                       | 2.70          | 0.067        | 0.188                           | 0.051 | 0.186            | 0.046 | 0.180       | 0.050 | -0.003   | 0.541   | -0.008 | 0.059        | -0.006 | 0.288        |

F F-statistic, SD standard deviation, MD mean difference

Bold values indicate significant differences

**Table S5** Sample entropy in the medial-lateral direction as a function of  $r$  and  $m$  for a data length of  $N=1200$  (i.e. 60-seconds).

| $r$                       | One-way ANOVA |         | Descriptive statistics by group |       |                  |        |             |       | Post-hoc |         |        |         |        |         |
|---------------------------|---------------|---------|---------------------------------|-------|------------------|--------|-------------|-------|----------|---------|--------|---------|--------|---------|
|                           | F             | p-value | Young (Y)                       |       | Non-Fallers (NF) |        | Fallers (F) |       | NF - Y   |         | F - Y  |         | F - NF |         |
|                           |               |         | Mean                            | SD    | Mean             | SD     | Mean        | SD    | MD       | p-value | MD     | p-value | MD     | p-value |
| <b><math>m = 2</math></b> |               |         |                                 |       |                  |        |             |       |          |         |        |         |        |         |
| 0.1                       | 0.91          | 0.403   | 0.615                           | 0.138 | 0.619            | 0.125  | 0.605       | 0.131 | 0.004    | 0.831   | -0.010 | 0.562   | -0.014 | 0.370   |
| 0.15                      | 1.26          | 0.283   | 0.476                           | 0.119 | 0.484            | 0.109  | 0.472       | 0.115 | 0.008    | 0.358   | -0.004 | 0.905   | -0.012 | 0.410   |
| 0.2                       | 1.45          | 0.236   | 0.384                           | 0.110 | 0.392            | 0.102  | 0.382       | 0.107 | 0.008    | 0.257   | -0.002 | 0.975   | -0.010 | 0.453   |
| 0.25                      | 1.40          | 0.247   | 0.316                           | 0.100 | 0.324            | 0.094  | 0.315       | 0.098 | 0.008    | 0.265   | -0.001 | 0.981   | -0.009 | 0.476   |
| 0.3                       | 1.21          | 0.297   | 0.265                           | 0.090 | 0.272            | 0.086  | 0.264       | 0.089 | 0.006    | 0.321   | -0.001 | 0.978   | -0.008 | 0.513   |
| 0.35                      | 1.04          | 0.355   | 0.226                           | 0.080 | 0.231            | 0.077  | 0.224       | 0.080 | 0.005    | 0.386   | -0.001 | 0.974   | -0.006 | 0.550   |
| 0.4                       | 0.88          | 0.416   | 0.194                           | 0.071 | 0.198            | 0.068  | 0.193       | 0.072 | 0.004    | 0.453   | -0.001 | 0.972   | -0.005 | 0.592   |
| 0.45                      | 0.74          | 0.476   | 0.169                           | 0.063 | 0.173            | 0.061  | 0.168       | 0.064 | 0.003    | 0.509   | -0.001 | 0.978   | -0.004 | 0.644   |
| 0.5                       | 0.64          | 0.530   | 0.149                           | 0.057 | 0.152            | 0.054  | 0.148       | 0.058 | 0.003    | 0.559   | -0.001 | 0.982   | -0.004 | 0.689   |
| <b><math>m = 3</math></b> |               |         |                                 |       |                  |        |             |       |          |         |        |         |        |         |
| 0.1                       | 1.30          | 0.273   | 0.551                           | 0.143 | 0.555            | 0.136  | 0.537       | 0.141 | 0.004    | 0.870   | -0.014 | 0.369   | -0.018 | 0.243   |
| 0.15                      | 0.92          | 0.397   | 0.420                           | 0.107 | 0.423            | 0.099  | 0.412       | 0.103 | 0.003    | 0.811   | -0.008 | 0.571   | -0.011 | 0.364   |
| 0.2                       | 0.84          | 0.433   | 0.343                           | 0.090 | 0.347            | 0.082  | 0.339       | 0.086 | 0.004    | 0.660   | -0.005 | 0.764   | -0.008 | 0.442   |
| 0.25                      | 0.92          | 0.397   | 0.290                           | 0.081 | 0.295            | 0.073  | 0.288       | 0.077 | 0.004    | 0.513   | -0.003 | 0.881   | -0.007 | 0.479   |
| 0.3                       | 0.96          | 0.384   | 0.250                           | 0.074 | 0.255            | 0.068  | 0.249       | 0.071 | 0.004    | 0.445   | -0.002 | 0.944   | -0.006 | 0.528   |
| 0.35                      | 0.97          | 0.379   | 0.218                           | 0.068 | 0.222            | 0.063  | 0.217       | 0.065 | 0.004    | 0.426   | -0.001 | 0.959   | -0.005 | 0.545   |
| 0.4                       | 0.93          | 0.396   | 0.192                           | 0.063 | 0.196            | 0.059  | 0.191       | 0.061 | 0.004    | 0.437   | -0.001 | 0.967   | -0.005 | 0.568   |
| 0.45                      | 0.87          | 0.420   | 0.170                           | 0.058 | 0.174            | 0.055  | 0.169       | 0.056 | 0.003    | 0.454   | -0.001 | 0.974   | -0.004 | 0.599   |
| 0.5                       | 0.79          | 0.456   | 0.152                           | 0.054 | 0.155            | 0.051  | 0.151       | 0.052 | 0.003    | 0.488   | -0.001 | 0.978   | -0.004 | 0.630   |
| <b><math>m = 4</math></b> |               |         |                                 |       |                  |        |             |       |          |         |        |         |        |         |
| 0.1                       | 1.64          | 0.194   | 0.525                           | 0.145 | 0.532            | 0.139  | 0.512       | 0.143 | 0.007    | 0.589   | -0.013 | 0.444   | -0.020 | 0.175   |
| 0.15                      | 1.23          | 0.292   | 0.398                           | 0.108 | 0.402            | 0.102  | 0.389       | 0.106 | 0.004    | 0.739   | -0.009 | 0.488   | -0.013 | 0.262   |
| 0.2                       | 0.94          | 0.389   | 0.324                           | 0.089 | 0.326            | 0.082  | 0.317       | 0.085 | 0.003    | 0.778   | -0.006 | 0.590   | -0.009 | 0.360   |
| 0.25                      | 0.70          | 0.495   | 0.274                           | 0.076 | 0.276            | 0.069  | 0.269       | 0.073 | 0.003    | 0.763   | -0.004 | 0.739   | -0.007 | 0.482   |
| 0.3                       | 0.66          | 0.519   | 0.237                           | 0.068 | 0.239            | 0.061  | 0.234       | 0.064 | 0.003    | 0.709   | -0.003 | 0.824   | -0.006 | 0.534   |
| 0.35                      | 0.65          | 0.524   | 0.208                           | 0.062 | 0.211            | 0.056  | 0.206       | 0.059 | 0.003    | 0.659   | -0.002 | 0.882   | -0.005 | 0.572   |
| 0.4                       | 0.65          | 0.525   | 0.185                           | 0.057 | 0.187            | 0.052  | 0.183       | 0.054 | 0.003    | 0.615   | -0.002 | 0.927   | -0.004 | 0.609   |
| 0.45                      | 0.62          | 0.537   | 0.165                           | 0.053 | 0.167            | 0.048  | 0.164       | 0.050 | 0.002    | 0.598   | -0.001 | 0.957   | -0.004 | 0.651   |
| 0.5                       | 0.59          | 0.556   | 0.148                           | 0.049 | 0.151            | 0.045  | 0.148       | 0.047 | 0.002    | 0.600   | -0.001 | 0.972   | -0.003 | 0.686   |
| <b><math>m = 5</math></b> |               |         |                                 |       |                  |        |             |       |          |         |        |         |        |         |
| 0.1                       | 1.88          | 0.153   | 0.501                           | 0.142 | 0.509            | 0.137  | 0.489       | 0.140 | 0.008    | 0.443   | -0.012 | 0.491   | -0.020 | 0.151   |
| 0.15                      | 1.44          | 0.238   | 0.382                           | 0.106 | 0.387            | 0.101  | 0.373       | 0.105 | 0.005    | 0.640   | -0.009 | 0.483   | -0.014 | 0.216   |
| 0.2                       | 1.20          | 0.301   | 0.312                           | 0.087 | 0.315            | 0.0820 | 0.305       | 0.085 | 0.003    | 0.736   | -0.007 | 0.503   | -0.010 | 0.272   |
| 0.25                      | 0.89          | 0.411   | 0.264                           | 0.075 | 0.267            | 0.0690 | 0.259       | 0.072 | 0.003    | 0.769   | -0.005 | 0.628   | -0.008 | 0.385   |
| 0.3                       | 0.71          | 0.491   | 0.229                           | 0.067 | 0.231            | 0.0610 | 0.225       | 0.063 | 0.002    | 0.770   | -0.004 | 0.727   | -0.006 | 0.475   |
| 0.35                      | 0.63          | 0.533   | 0.201                           | 0.060 | 0.203            | 0.0540 | 0.198       | 0.057 | 0.002    | 0.759   | -0.003 | 0.789   | -0.005 | 0.529   |
| 0.4                       | 0.54          | 0.581   | 0.179                           | 0.055 | 0.181            | 0.0500 | 0.177       | 0.052 | 0.002    | 0.737   | -0.002 | 0.866   | -0.004 | 0.602   |
| 0.45                      | 0.51          | 0.600   | 0.160                           | 0.050 | 0.162            | 0.0460 | 0.159       | 0.047 | 0.002    | 0.708   | -0.001 | 0.916   | -0.003 | 0.650   |
| 0.5                       | 0.46          | 0.634   | 0.144                           | 0.047 | 0.146            | 0.0430 | 0.143       | 0.044 | 0.002    | 0.703   | -0.001 | 0.953   | -0.003 | 0.710   |

$F$  F-statistic,  $SD$  standard deviation,  $MD$  mean difference

Bold values indicate significant differences

Table S6 Sample entropy in the anterior-posterior direction as a function of  $r$  and  $m$  for a data length of  $N=600$  (i.e. 30-seconds).

| $r$                       | One-way ANOVA |         | Descriptive statistics by group |       |                  |       |             |       | Post-hoc |         |       |         |        |         |
|---------------------------|---------------|---------|---------------------------------|-------|------------------|-------|-------------|-------|----------|---------|-------|---------|--------|---------|
|                           | F             | p-value | Young (Y)                       |       | Non-Fallers (NF) |       | Fallers (F) |       | NF - Y   |         | F - Y |         | F - NF |         |
|                           |               |         | Mean                            | SD    | Mean             | SD    | Mean        | SD    | MD       | p-value | MD    | p-value | MD     | p-value |
| <b><math>m = 2</math></b> |               |         |                                 |       |                  |       |             |       |          |         |       |         |        |         |
| 0.1                       | 96.27         | <0.001  | 0.622                           | 0.165 | 0.724            | 0.156 | 0.737       | 0.187 | 0.102    | <0.001  | 0.115 | <0.001  | 0.013  | 0.565   |
| 0.15                      | 107.59        | <0.001  | 0.484                           | 0.137 | 0.572            | 0.122 | 0.580       | 0.148 | 0.088    | <0.001  | 0.096 | <0.001  | 0.009  | 0.694   |
| 0.2                       | 111.29        | <0.001  | 0.394                           | 0.124 | 0.476            | 0.112 | 0.481       | 0.133 | 0.082    | <0.001  | 0.087 | <0.001  | 0.005  | 0.871   |
| 0.25                      | 111.62        | <0.001  | 0.328                           | 0.114 | 0.404            | 0.105 | 0.408       | 0.124 | 0.076    | <0.001  | 0.080 | <0.001  | 0.004  | 0.894   |
| 0.3                       | 109.64        | <0.001  | 0.277                           | 0.104 | 0.347            | 0.099 | 0.351       | 0.116 | 0.070    | <0.001  | 0.074 | <0.001  | 0.004  | 0.896   |
| 0.35                      | 107.43        | <0.001  | 0.237                           | 0.095 | 0.301            | 0.092 | 0.305       | 0.108 | 0.063    | <0.001  | 0.067 | <0.001  | 0.004  | 0.845   |
| 0.4                       | 105.38        | <0.001  | 0.206                           | 0.085 | 0.262            | 0.085 | 0.267       | 0.099 | 0.057    | <0.001  | 0.061 | <0.001  | 0.005  | 0.787   |
| 0.45                      | 103.19        | <0.001  | 0.180                           | 0.077 | 0.230            | 0.077 | 0.235       | 0.091 | 0.051    | <0.001  | 0.056 | <0.001  | 0.005  | 0.719   |
| 0.5                       | 101.31        | <0.001  | 0.159                           | 0.069 | 0.204            | 0.070 | 0.209       | 0.083 | 0.045    | <0.001  | 0.050 | <0.001  | 0.005  | 0.667   |
| <b><math>m = 3</math></b> |               |         |                                 |       |                  |       |             |       |          |         |       |         |        |         |
| 0.1                       | 98.14         | <0.001  | 0.567                           | 0.175 | 0.679            | 0.172 | 0.688       | 0.204 | 0.112    | <0.001  | 0.121 | <0.001  | 0.009  | 0.802   |
| 0.15                      | 105.90        | <0.001  | 0.432                           | 0.132 | 0.519            | 0.131 | 0.531       | 0.158 | 0.087    | <0.001  | 0.099 | <0.001  | 0.012  | 0.508   |
| 0.2                       | 106.88        | <0.001  | 0.354                           | 0.109 | 0.426            | 0.107 | 0.435       | 0.129 | 0.072    | <0.001  | 0.081 | <0.001  | 0.009  | 0.530   |
| 0.25                      | 107.26        | <0.001  | 0.300                           | 0.095 | 0.362            | 0.091 | 0.369       | 0.110 | 0.062    | <0.001  | 0.070 | <0.001  | 0.007  | 0.579   |
| 0.3                       | 107.27        | <0.001  | 0.259                           | 0.086 | 0.315            | 0.081 | 0.321       | 0.098 | 0.056    | <0.001  | 0.062 | <0.001  | 0.006  | 0.669   |
| 0.35                      | 107.29        | <0.001  | 0.226                           | 0.079 | 0.278            | 0.074 | 0.282       | 0.088 | 0.052    | <0.001  | 0.056 | <0.001  | 0.004  | 0.780   |
| 0.4                       | 106.56        | <0.001  | 0.200                           | 0.073 | 0.248            | 0.069 | 0.251       | 0.082 | 0.048    | <0.001  | 0.052 | <0.001  | 0.003  | 0.815   |
| 0.45                      | 105.75        | <0.001  | 0.178                           | 0.068 | 0.222            | 0.065 | 0.225       | 0.076 | 0.045    | <0.001  | 0.048 | <0.001  | 0.003  | 0.820   |
| 0.5                       | 103.89        | <0.001  | 0.159                           | 0.063 | 0.200            | 0.061 | 0.203       | 0.071 | 0.041    | <0.001  | 0.044 | <0.001  | 0.003  | 0.809   |
| <b><math>m = 4</math></b> |               |         |                                 |       |                  |       |             |       |          |         |       |         |        |         |
| 0.1                       | 96.77         | <0.001  | 0.538                           | 0.176 | 0.651            | 0.174 | 0.657       | 0.205 | 0.113    | <0.001  | 0.119 | <0.001  | 0.006  | 0.909   |
| 0.15                      | 107.22        | <0.001  | 0.410                           | 0.132 | 0.499            | 0.132 | 0.508       | 0.159 | 0.089    | <0.001  | 0.098 | <0.001  | 0.009  | 0.687   |
| 0.2                       | 108.88        | <0.001  | 0.336                           | 0.108 | 0.410            | 0.109 | 0.417       | 0.132 | 0.074    | <0.001  | 0.081 | <0.001  | 0.007  | 0.685   |
| 0.25                      | 106.78        | <0.001  | 0.285                           | 0.093 | 0.347            | 0.093 | 0.354       | 0.112 | 0.062    | <0.001  | 0.070 | <0.001  | 0.007  | 0.579   |
| 0.3                       | 104.93        | <0.001  | 0.247                           | 0.082 | 0.301            | 0.081 | 0.308       | 0.098 | 0.054    | <0.001  | 0.061 | <0.001  | 0.007  | 0.566   |
| 0.35                      | 104.19        | <0.001  | 0.217                           | 0.074 | 0.265            | 0.073 | 0.271       | 0.087 | 0.049    | <0.001  | 0.054 | <0.001  | 0.006  | 0.613   |
| 0.4                       | 104.08        | <0.001  | 0.192                           | 0.068 | 0.237            | 0.066 | 0.241       | 0.078 | 0.044    | <0.001  | 0.049 | <0.001  | 0.005  | 0.644   |
| 0.45                      | 103.50        | <0.001  | 0.172                           | 0.063 | 0.213            | 0.061 | 0.217       | 0.072 | 0.041    | <0.001  | 0.045 | <0.001  | 0.004  | 0.682   |
| 0.5                       | 102.30        | <0.001  | 0.155                           | 0.058 | 0.192            | 0.056 | 0.196       | 0.066 | 0.038    | <0.001  | 0.041 | <0.001  | 0.004  | 0.693   |
| <b><math>m = 5</math></b> |               |         |                                 |       |                  |       |             |       |          |         |       |         |        |         |
| 0.1                       | 75.78         | <0.001  | 0.509                           | 0.192 | 0.615            | 0.176 | 0.617       | 0.211 | 0.106    | <0.001  | 0.109 | <0.001  | 0.002  | 0.987   |
| 0.15                      | 103.92        | <0.001  | 0.389                           | 0.128 | 0.475            | 0.128 | 0.480       | 0.152 | 0.086    | <0.001  | 0.091 | <0.001  | 0.005  | 0.874   |
| 0.2                       | 107.87        | <0.001  | 0.321                           | 0.105 | 0.393            | 0.105 | 0.398       | 0.127 | 0.072    | <0.001  | 0.077 | <0.001  | 0.005  | 0.825   |
| 0.25                      | 106.37        | <0.001  | 0.274                           | 0.091 | 0.335            | 0.091 | 0.341       | 0.109 | 0.061    | <0.001  | 0.067 | <0.001  | 0.006  | 0.703   |
| 0.3                       | 104.62        | <0.001  | 0.238                           | 0.081 | 0.292            | 0.080 | 0.297       | 0.096 | 0.053    | <0.001  | 0.059 | <0.001  | 0.006  | 0.654   |
| 0.35                      | 104.18        | <0.001  | 0.210                           | 0.073 | 0.258            | 0.072 | 0.263       | 0.086 | 0.048    | <0.001  | 0.053 | <0.001  | 0.005  | 0.647   |
| 0.4                       | 103.06        | <0.001  | 0.187                           | 0.066 | 0.230            | 0.066 | 0.235       | 0.077 | 0.043    | <0.001  | 0.048 | <0.001  | 0.005  | 0.655   |
| 0.45                      | 101.96        | <0.001  | 0.168                           | 0.061 | 0.207            | 0.060 | 0.211       | 0.070 | 0.039    | <0.001  | 0.044 | <0.001  | 0.004  | 0.652   |
| 0.5                       | 100.66        | <0.001  | 0.151                           | 0.056 | 0.187            | 0.055 | 0.191       | 0.065 | 0.036    | <0.001  | 0.040 | <0.001  | 0.004  | 0.645   |

$F$  F-statistic,  $SD$  standard deviation,  $MD$  mean difference

Bold values indicate significant differences

**Table S7** Sample entropy in the medial-lateral direction as a function of  $r$  and  $m$  for a data length of  $N=600$  (i.e. 30-seconds).

| $r$                       | One-way ANOVA |              | Descriptive statistics by group |       |                  |       |             |       | Post-hoc |         |        |              |        |              |
|---------------------------|---------------|--------------|---------------------------------|-------|------------------|-------|-------------|-------|----------|---------|--------|--------------|--------|--------------|
|                           | F             | p-value      | Young (Y)                       |       | Non-Fallers (NF) |       | Fallers (F) |       | NF - Y   |         | F - Y  |              | F - NF |              |
|                           |               |              | Mean                            | SD    | Mean             | SD    | Mean        | SD    | MD       | p-value | MD     | p-value      | MD     | p-value      |
| <b><math>m = 2</math></b> |               |              |                                 |       |                  |       |             |       |          |         |        |              |        |              |
| 0.1                       | 4.27          | <b>0.014</b> | 0.658                           | 0.145 | 0.651            | 0.133 | 0.627       | 0.139 | -0.007   | 0.581   | -0.031 | <b>0.010</b> | -0.024 | 0.079        |
| 0.15                      | 2.43          | 0.089        | 0.516                           | 0.119 | 0.516            | 0.110 | 0.498       | 0.119 | 0        | 1       | -0.019 | 0.083        | -0.018 | 0.106        |
| 0.2                       | 1.77          | 0.170        | 0.424                           | 0.109 | 0.427            | 0.103 | 0.411       | 0.112 | 0.003    | 0.875   | -0.013 | 0.234        | -0.016 | 0.148        |
| 0.25                      | 1.62          | 0.197        | 0.355                           | 0.102 | 0.359            | 0.098 | 0.345       | 0.106 | 0.004    | 0.703   | -0.010 | 0.367        | -0.014 | 0.170        |
| 0.3                       | 1.52          | 0.220        | 0.302                           | 0.094 | 0.306            | 0.091 | 0.293       | 0.098 | 0.004    | 0.676   | -0.009 | 0.423        | -0.013 | 0.194        |
| 0.35                      | 1.40          | 0.246        | 0.259                           | 0.086 | 0.263            | 0.084 | 0.251       | 0.090 | 0.004    | 0.690   | -0.008 | 0.456        | -0.011 | 0.219        |
| 0.4                       | 1.25          | 0.286        | 0.225                           | 0.078 | 0.228            | 0.077 | 0.218       | 0.082 | 0.003    | 0.740   | -0.007 | 0.479        | -0.010 | 0.256        |
| 0.45                      | 1.12          | 0.327        | 0.197                           | 0.071 | 0.199            | 0.069 | 0.191       | 0.074 | 0.002    | 0.772   | -0.006 | 0.511        | -0.008 | 0.295        |
| 0.5                       | 1.01          | 0.363        | 0.174                           | 0.064 | 0.176            | 0.062 | 0.169       | 0.067 | 0.002    | 0.813   | -0.005 | 0.527        | -0.007 | 0.330        |
| <b><math>m = 3</math></b> |               |              |                                 |       |                  |       |             |       |          |         |        |              |        |              |
| 0.1                       | 4.34          | <b>0.013</b> | 0.593                           | 0.158 | 0.588            | 0.150 | 0.559       | 0.152 | -0.006   | 0.743   | -0.034 | <b>0.009</b> | -0.029 | <b>0.049</b> |
| 0.15                      | 3.71          | <b>0.025</b> | 0.453                           | 0.115 | 0.448            | 0.107 | 0.430       | 0.111 | -0.005   | 0.601   | -0.023 | <b>0.018</b> | -0.017 | 0.116        |
| 0.2                       | 3.01          | <b>0.049</b> | 0.373                           | 0.093 | 0.370            | 0.086 | 0.356       | 0.090 | -0.003   | 0.733   | -0.017 | <b>0.038</b> | -0.013 | 0.147        |
| 0.25                      | 2.29          | 0.101        | 0.318                           | 0.082 | 0.317            | 0.075 | 0.305       | 0.079 | -0.001   | 0.945   | -0.013 | 0.085        | -0.011 | 0.159        |
| 0.3                       | 1.94          | 0.145        | 0.277                           | 0.075 | 0.278            | 0.069 | 0.267       | 0.074 | 0        | 0.996   | -0.010 | 0.146        | -0.011 | 0.154        |
| 0.35                      | 1.60          | 0.203        | 0.244                           | 0.070 | 0.245            | 0.065 | 0.236       | 0.069 | 0.001    | 0.947   | -0.008 | 0.239        | -0.009 | 0.189        |
| 0.4                       | 1.43          | 0.240        | 0.217                           | 0.065 | 0.218            | 0.061 | 0.210       | 0.065 | 0.002    | 0.880   | -0.007 | 0.321        | -0.008 | 0.212        |
| 0.45                      | 1.32          | 0.266        | 0.194                           | 0.061 | 0.195            | 0.058 | 0.188       | 0.062 | 0.002    | 0.817   | -0.006 | 0.395        | -0.008 | 0.234        |
| 0.5                       | 1.24          | 0.290        | 0.174                           | 0.057 | 0.176            | 0.054 | 0.169       | 0.058 | 0.002    | 0.784   | -0.005 | 0.452        | -0.007 | 0.258        |
| <b><math>m = 4</math></b> |               |              |                                 |       |                  |       |             |       |          |         |        |              |        |              |
| 0.1                       | 3.50          | <b>0.030</b> | 0.562                           | 0.160 | 0.560            | 0.153 | 0.531       | 0.156 | -0.002   | 0.980   | -0.031 | <b>0.026</b> | -0.029 | <b>0.048</b> |
| 0.15                      | 3.37          | <b>0.035</b> | 0.428                           | 0.117 | 0.424            | 0.110 | 0.405       | 0.115 | -0.004   | 0.784   | -0.022 | <b>0.026</b> | -0.019 | 0.098        |
| 0.2                       | 3.18          | <b>0.042</b> | 0.350                           | 0.094 | 0.346            | 0.088 | 0.333       | 0.091 | -0.004   | 0.673   | -0.017 | <b>0.032</b> | -0.013 | 0.147        |
| 0.25                      | 2.86          | 0.058        | 0.298                           | 0.080 | 0.295            | 0.073 | 0.284       | 0.077 | -0.003   | 0.717   | -0.014 | <b>0.045</b> | -0.011 | 0.173        |
| 0.3                       | 2.45          | 0.087        | 0.260                           | 0.070 | 0.258            | 0.064 | 0.249       | 0.068 | -0.002   | 0.825   | -0.011 | 0.069        | -0.009 | 0.190        |
| 0.35                      | 2.14          | 0.118        | 0.230                           | 0.064 | 0.229            | 0.058 | 0.220       | 0.062 | -0.001   | 0.919   | -0.010 | 0.098        | -0.008 | 0.196        |
| 0.4                       | 1.76          | 0.172        | 0.206                           | 0.059 | 0.205            | 0.054 | 0.198       | 0.057 | -0.001   | 0.975   | -0.008 | 0.152        | -0.007 | 0.228        |
| 0.45                      | 1.48          | 0.228        | 0.185                           | 0.055 | 0.185            | 0.050 | 0.179       | 0.053 | 0        | 1       | -0.007 | 0.217        | -0.007 | 0.255        |
| 0.5                       | 1.29          | 0.276        | 0.168                           | 0.051 | 0.168            | 0.047 | 0.162       | 0.050 | 0        | 0.993   | -0.006 | 0.283        | -0.006 | 0.280        |
| <b><math>m = 5</math></b> |               |              |                                 |       |                  |       |             |       |          |         |        |              |        |              |
| 0.1                       | 2.58          | 0.076        | 0.529                           | 0.160 | 0.530            | 0.157 | 0.504       | 0.160 | 0.001    | 0.991   | -0.026 | 0.079        | -0.027 | 0.081        |
| 0.15                      | 2.92          | 0.054        | 0.406                           | 0.113 | 0.403            | 0.108 | 0.385       | 0.114 | -0.002   | 0.907   | -0.020 | <b>0.043</b> | -0.018 | 0.103        |
| 0.2                       | 2.78          | 0.062        | 0.334                           | 0.091 | 0.331            | 0.086 | 0.318       | 0.092 | -0.003   | 0.758   | -0.016 | <b>0.048</b> | -0.013 | 0.167        |
| 0.25                      | 2.70          | 0.067        | 0.285                           | 0.078 | 0.283            | 0.073 | 0.272       | 0.077 | -0.003   | 0.775   | -0.013 | 0.053        | -0.011 | 0.172        |
| 0.3                       | 2.48          | 0.084        | 0.249                           | 0.069 | 0.247            | 0.064 | 0.238       | 0.067 | -0.002   | 0.827   | -0.011 | 0.067        | -0.009 | 0.183        |
| 0.35                      | 2.29          | 0.102        | 0.221                           | 0.062 | 0.219            | 0.057 | 0.211       | 0.060 | -0.002   | 0.837   | -0.010 | 0.082        | -0.008 | 0.21         |
| 0.4                       | 2.02          | 0.134        | 0.198                           | 0.057 | 0.196            | 0.052 | 0.190       | 0.055 | -0.001   | 0.862   | -0.008 | 0.110        | -0.007 | 0.249        |
| 0.45                      | 1.66          | 0.190        | 0.179                           | 0.052 | 0.178            | 0.048 | 0.172       | 0.051 | -0.001   | 0.926   | -0.007 | 0.163        | -0.006 | 0.288        |
| 0.5                       | 1.49          | 0.225        | 0.162                           | 0.049 | 0.161            | 0.044 | 0.156       | 0.047 | -0.001   | 0.965   | -0.006 | 0.199        | -0.005 | 0.301        |

$F$  F-statistic,  $SD$  standard deviation,  $MD$  mean difference

Bold values indicate significant differences

**Table S8** Sample entropy in the anterior-posterior direction as a function of  $r$  and  $m$  for a data length of  $N=1200$  (i.e. 60-seconds): eyes open – rigid surface (OR)

| $r$                       | One-way ANOVA |         | Summary statistics by group |       |                  |       |             |       | Post-hoc |         |       |         |        |         |
|---------------------------|---------------|---------|-----------------------------|-------|------------------|-------|-------------|-------|----------|---------|-------|---------|--------|---------|
|                           | F             | p-value | Young (Y)                   |       | Non-Fallers (NF) |       | Fallers (F) |       | NF - Y   |         | F - Y |         | F - NF |         |
|                           |               |         | Mean                        | SD    | Mean             | SD    | Mean        | SD    | MD       | p-value | MD    | p-value | MD     | p-value |
| <b><math>m = 2</math></b> |               |         |                             |       |                  |       |             |       |          |         |       |         |        |         |
| 0.1                       | 25.84         | <0.001  | 0.540                       | 0.156 | 0.640            | 0.157 | 0.662       | 0.190 | 0.100    | <0.001  | 0.121 | <0.001  | 0.022  | 0.663   |
| 0.15                      | 30.58         | <0.001  | 0.399                       | 0.133 | 0.492            | 0.129 | 0.509       | 0.161 | 0.092    | <0.001  | 0.109 | <0.001  | 0.017  | 0.703   |
| 0.2                       | 31.51         | <0.001  | 0.310                       | 0.118 | 0.394            | 0.117 | 0.411       | 0.148 | 0.084    | <0.001  | 0.101 | <0.001  | 0.017  | 0.628   |
| 0.25                      | 31.25         | <0.001  | 0.249                       | 0.104 | 0.323            | 0.107 | 0.342       | 0.138 | 0.074    | <0.001  | 0.093 | <0.001  | 0.019  | 0.505   |
| 0.3                       | 30.82         | <0.001  | 0.204                       | 0.091 | 0.269            | 0.096 | 0.288       | 0.127 | 0.064    | <0.001  | 0.084 | <0.001  | 0.020  | 0.405   |
| 0.35                      | 30.26         | <0.001  | 0.171                       | 0.079 | 0.227            | 0.086 | 0.247       | 0.115 | 0.056    | <0.001  | 0.075 | <0.001  | 0.019  | 0.325   |
| 0.4                       | 29.78         | <0.001  | 0.146                       | 0.070 | 0.195            | 0.077 | 0.214       | 0.104 | 0.049    | <0.001  | 0.067 | <0.001  | 0.019  | 0.264   |
| 0.45                      | 29.52         | <0.001  | 0.127                       | 0.061 | 0.169            | 0.068 | 0.187       | 0.094 | 0.043    | <0.001  | 0.060 | <0.001  | 0.018  | 0.224   |
| 0.5                       | 29.39         | <0.001  | 0.111                       | 0.054 | 0.149            | 0.061 | 0.165       | 0.085 | 0.038    | <0.001  | 0.054 | <0.001  | 0.016  | 0.196   |
| <b><math>m = 3</math></b> |               |         |                             |       |                  |       |             |       |          |         |       |         |        |         |
| 0.1                       | 24.08         | <0.001  | 0.488                       | 0.152 | 0.587            | 0.170 | 0.612       | 0.208 | 0.098    | <0.001  | 0.124 | <0.001  | 0.025  | 0.593   |
| 0.15                      | 28.21         | <0.001  | 0.363                       | 0.114 | 0.442            | 0.127 | 0.463       | 0.155 | 0.079    | <0.001  | 0.100 | <0.001  | 0.021  | 0.538   |
| 0.2                       | 30.17         | <0.001  | 0.289                       | 0.096 | 0.358            | 0.103 | 0.374       | 0.127 | 0.068    | <0.001  | 0.085 | <0.001  | 0.016  | 0.565   |
| 0.25                      | 31.34         | <0.001  | 0.238                       | 0.086 | 0.300            | 0.089 | 0.314       | 0.112 | 0.062    | <0.001  | 0.076 | <0.001  | 0.014  | 0.569   |
| 0.3                       | 32.03         | <0.001  | 0.200                       | 0.078 | 0.257            | 0.080 | 0.270       | 0.102 | 0.056    | <0.001  | 0.069 | <0.001  | 0.013  | 0.570   |
| 0.35                      | 32.05         | <0.001  | 0.171                       | 0.071 | 0.222            | 0.073 | 0.235       | 0.094 | 0.051    | <0.001  | 0.064 | <0.001  | 0.012  | 0.538   |
| 0.4                       | 31.88         | <0.001  | 0.148                       | 0.064 | 0.194            | 0.068 | 0.207       | 0.087 | 0.047    | <0.001  | 0.059 | <0.001  | 0.012  | 0.479   |
| 0.45                      | 31.47         | <0.001  | 0.129                       | 0.059 | 0.171            | 0.062 | 0.184       | 0.081 | 0.042    | <0.001  | 0.054 | <0.001  | 0.012  | 0.421   |
| 0.5                       | 31.06         | <0.001  | 0.114                       | 0.053 | 0.152            | 0.057 | 0.164       | 0.075 | 0.038    | <0.001  | 0.050 | <0.001  | 0.012  | 0.364   |
| <b><math>m = 4</math></b> |               |         |                             |       |                  |       |             |       |          |         |       |         |        |         |
| 0.1                       | 25.47         | <0.001  | 0.463                       | 0.151 | 0.566            | 0.171 | 0.588       | 0.214 | 0.103    | <0.001  | 0.124 | <0.001  | 0.022  | 0.684   |
| 0.15                      | 28.46         | <0.001  | 0.343                       | 0.111 | 0.424            | 0.130 | 0.442       | 0.158 | 0.081    | <0.001  | 0.099 | <0.001  | 0.018  | 0.613   |
| 0.2                       | 29.72         | <0.001  | 0.275                       | 0.092 | 0.341            | 0.103 | 0.358       | 0.127 | 0.066    | <0.001  | 0.083 | <0.001  | 0.017  | 0.530   |
| 0.25                      | 30.52         | <0.001  | 0.228                       | 0.080 | 0.286            | 0.087 | 0.301       | 0.109 | 0.057    | <0.001  | 0.073 | <0.001  | 0.015  | 0.489   |
| 0.3                       | 31.34         | <0.001  | 0.194                       | 0.071 | 0.245            | 0.076 | 0.258       | 0.096 | 0.051    | <0.001  | 0.065 | <0.001  | 0.013  | 0.504   |
| 0.35                      | 31.83         | <0.001  | 0.167                       | 0.064 | 0.214            | 0.069 | 0.226       | 0.087 | 0.047    | <0.001  | 0.059 | <0.001  | 0.012  | 0.498   |
| 0.4                       | 32.05         | <0.001  | 0.145                       | 0.059 | 0.188            | 0.062 | 0.200       | 0.079 | 0.043    | <0.001  | 0.054 | <0.001  | 0.011  | 0.486   |
| 0.45                      | 32.04         | <0.001  | 0.128                       | 0.054 | 0.167            | 0.057 | 0.178       | 0.073 | 0.039    | <0.001  | 0.050 | <0.001  | 0.011  | 0.463   |
| 0.5                       | 31.97         | <0.001  | 0.113                       | 0.050 | 0.150            | 0.053 | 0.160       | 0.067 | 0.036    | <0.001  | 0.046 | <0.001  | 0.010  | 0.435   |
| <b><math>m = 5</math></b> |               |         |                             |       |                  |       |             |       |          |         |       |         |        |         |
| 0.1                       | 24.20         | <0.001  | 0.444                       | 0.148 | 0.543            | 0.167 | 0.561       | 0.205 | 0.099    | <0.001  | 0.116 | <0.001  | 0.018  | 0.767   |
| 0.15                      | 28.85         | <0.001  | 0.331                       | 0.109 | 0.410            | 0.126 | 0.428       | 0.156 | 0.079    | <0.001  | 0.097 | <0.001  | 0.018  | 0.605   |
| 0.2                       | 29.91         | <0.001  | 0.265                       | 0.089 | 0.330            | 0.100 | 0.348       | 0.128 | 0.065    | <0.001  | 0.083 | <0.001  | 0.018  | 0.467   |
| 0.25                      | 30.55         | <0.001  | 0.221                       | 0.078 | 0.277            | 0.086 | 0.294       | 0.109 | 0.056    | <0.001  | 0.072 | <0.001  | 0.016  | 0.425   |
| 0.3                       | 31.29         | <0.001  | 0.188                       | 0.069 | 0.238            | 0.075 | 0.253       | 0.096 | 0.050    | <0.001  | 0.064 | <0.001  | 0.015  | 0.421   |
| 0.35                      | 31.44         | <0.001  | 0.163                       | 0.062 | 0.208            | 0.067 | 0.221       | 0.085 | 0.045    | <0.001  | 0.058 | <0.001  | 0.013  | 0.426   |
| 0.4                       | 31.80         | <0.001  | 0.143                       | 0.057 | 0.184            | 0.061 | 0.195       | 0.077 | 0.041    | <0.001  | 0.053 | <0.001  | 0.012  | 0.422   |
| 0.45                      | 31.90         | <0.001  | 0.126                       | 0.052 | 0.163            | 0.055 | 0.175       | 0.070 | 0.037    | <0.001  | 0.049 | <0.001  | 0.011  | 0.389   |
| 0.5                       | 32.05         | <0.001  | 0.112                       | 0.048 | 0.146            | 0.051 | 0.157       | 0.065 | 0.034    | <0.001  | 0.045 | <0.001  | 0.011  | 0.378   |

$F$  F-statistic,  $SD$  standard deviation,  $MD$  mean difference

Bold values indicate significant differences

**Table S9** Sample entropy in the anterior-posterior direction as a function of  $r$  and  $m$  for a data length of  $N=1200$  (i.e. 60-seconds): eyes closed – rigid surface (CR)

| $r$                       | One-way ANOVA |         | Summary statistics by group |       |                  |       |             |       | Post-hoc |         |       |         |        |         |
|---------------------------|---------------|---------|-----------------------------|-------|------------------|-------|-------------|-------|----------|---------|-------|---------|--------|---------|
|                           | F             | p-value | Young (Y)                   |       | Non-Fallers (NF) |       | Fallers (F) |       | NF - Y   |         | F - Y |         | F - NF |         |
|                           |               |         | Mean                        | SD    | Mean             | SD    | Mean        | SD    | MD       | p-value | MD    | p-value | MD     | p-value |
| <b><math>m = 2</math></b> |               |         |                             |       |                  |       |             |       |          |         |       |         |        |         |
| 0.1                       | 38.88         | <0.001  | 0.542                       | 0.167 | 0.673            | 0.157 | 0.694       | 0.212 | 0.131    | <0.001  | 0.152 | <0.001  | 0.021  | 0.706   |
| 0.15                      | 44.38         | <0.001  | 0.401                       | 0.142 | 0.520            | 0.129 | 0.532       | 0.172 | 0.119    | <0.001  | 0.132 | <0.001  | 0.013  | 0.830   |
| 0.2                       | 45.93         | <0.001  | 0.312                       | 0.125 | 0.421            | 0.119 | 0.433       | 0.153 | 0.108    | <0.001  | 0.121 | <0.001  | 0.012  | 0.807   |
| 0.25                      | 46.09         | <0.001  | 0.251                       | 0.110 | 0.348            | 0.111 | 0.362       | 0.140 | 0.097    | <0.001  | 0.111 | <0.001  | 0.013  | 0.732   |
| 0.3                       | 45.55         | <0.001  | 0.207                       | 0.096 | 0.293            | 0.103 | 0.307       | 0.127 | 0.086    | <0.001  | 0.100 | <0.001  | 0.014  | 0.649   |
| 0.35                      | 44.90         | <0.001  | 0.174                       | 0.084 | 0.250            | 0.094 | 0.264       | 0.115 | 0.076    | <0.001  | 0.090 | <0.001  | 0.015  | 0.565   |
| 0.4                       | 44.32         | <0.001  | 0.149                       | 0.074 | 0.215            | 0.085 | 0.230       | 0.103 | 0.066    | <0.001  | 0.081 | <0.001  | 0.014  | 0.492   |
| 0.45                      | 43.86         | <0.001  | 0.129                       | 0.065 | 0.188            | 0.076 | 0.201       | 0.093 | 0.058    | <0.001  | 0.072 | <0.001  | 0.014  | 0.450   |
| 0.5                       | 43.55         | <0.001  | 0.114                       | 0.057 | 0.165            | 0.069 | 0.178       | 0.083 | 0.052    | <0.001  | 0.065 | <0.001  | 0.013  | 0.418   |
| <b><math>m = 3</math></b> |               |         |                             |       |                  |       |             |       |          |         |       |         |        |         |
| 0.1                       | 36.82         | <0.001  | 0.490                       | 0.162 | 0.622            | 0.173 | 0.648       | 0.236 | 0.131    | <0.001  | 0.157 | <0.001  | 0.026  | 0.613   |
| 0.15                      | 41.47         | <0.001  | 0.365                       | 0.123 | 0.469            | 0.128 | 0.488       | 0.174 | 0.104    | <0.001  | 0.124 | <0.001  | 0.019  | 0.610   |
| 0.2                       | 43.70         | <0.001  | 0.291                       | 0.104 | 0.380            | 0.104 | 0.395       | 0.140 | 0.089    | <0.001  | 0.104 | <0.001  | 0.015  | 0.644   |
| 0.25                      | 44.96         | <0.001  | 0.240                       | 0.092 | 0.320            | 0.090 | 0.332       | 0.120 | 0.079    | <0.001  | 0.092 | <0.001  | 0.012  | 0.682   |
| 0.3                       | 45.53         | <0.001  | 0.202                       | 0.083 | 0.275            | 0.082 | 0.285       | 0.107 | 0.072    | <0.001  | 0.083 | <0.001  | 0.011  | 0.710   |
| 0.35                      | 45.61         | <0.001  | 0.173                       | 0.075 | 0.239            | 0.076 | 0.249       | 0.097 | 0.066    | <0.001  | 0.076 | <0.001  | 0.010  | 0.682   |
| 0.4                       | 45.09         | <0.001  | 0.150                       | 0.069 | 0.210            | 0.071 | 0.220       | 0.089 | 0.060    | <0.001  | 0.070 | <0.001  | 0.010  | 0.653   |
| 0.45                      | 44.64         | <0.001  | 0.132                       | 0.062 | 0.186            | 0.066 | 0.196       | 0.082 | 0.055    | <0.001  | 0.064 | <0.001  | 0.010  | 0.619   |
| 0.5                       | 44.23         | <0.001  | 0.116                       | 0.057 | 0.166            | 0.061 | 0.175       | 0.075 | 0.050    | <0.001  | 0.059 | <0.001  | 0.009  | 0.586   |
| <b><math>m = 4</math></b> |               |         |                             |       |                  |       |             |       |          |         |       |         |        |         |
| 0.1                       | 37.73         | <0.001  | 0.466                       | 0.162 | 0.602            | 0.175 | 0.623       | 0.244 | 0.136    | <0.001  | 0.157 | <0.001  | 0.021  | 0.720   |
| 0.15                      | 41.48         | <0.001  | 0.345                       | 0.120 | 0.450            | 0.130 | 0.470       | 0.182 | 0.105    | <0.001  | 0.125 | <0.001  | 0.020  | 0.609   |
| 0.2                       | 43.35         | <0.001  | 0.277                       | 0.099 | 0.364            | 0.105 | 0.380       | 0.143 | 0.087    | <0.001  | 0.103 | <0.001  | 0.016  | 0.594   |
| 0.25                      | 44.04         | <0.001  | 0.230                       | 0.086 | 0.305            | 0.089 | 0.319       | 0.120 | 0.075    | <0.001  | 0.089 | <0.001  | 0.014  | 0.590   |
| 0.3                       | 44.66         | <0.001  | 0.196                       | 0.077 | 0.262            | 0.078 | 0.274       | 0.104 | 0.067    | <0.001  | 0.079 | <0.001  | 0.012  | 0.607   |
| 0.35                      | 44.78         | <0.001  | 0.169                       | 0.069 | 0.229            | 0.070 | 0.240       | 0.092 | 0.060    | <0.001  | 0.071 | <0.001  | 0.011  | 0.611   |
| 0.4                       | 44.63         | <0.001  | 0.147                       | 0.063 | 0.202            | 0.064 | 0.212       | 0.083 | 0.055    | <0.001  | 0.064 | <0.001  | 0.009  | 0.634   |
| 0.45                      | 44.14         | <0.001  | 0.130                       | 0.058 | 0.180            | 0.059 | 0.189       | 0.076 | 0.050    | <0.001  | 0.059 | <0.001  | 0.009  | 0.629   |
| 0.5                       | 43.79         | <0.001  | 0.116                       | 0.053 | 0.162            | 0.055 | 0.170       | 0.070 | 0.046    | <0.001  | 0.054 | <0.001  | 0.008  | 0.615   |
| <b><math>m = 5</math></b> |               |         |                             |       |                  |       |             |       |          |         |       |         |        |         |
| 0.1                       | 38.93         | <0.001  | 0.444                       | 0.156 | 0.576            | 0.170 | 0.614       | 0.264 | 0.131    | <0.001  | 0.170 | <0.001  | 0.039  | 0.340   |
| 0.15                      | 42.01         | <0.001  | 0.332                       | 0.116 | 0.434            | 0.126 | 0.455       | 0.183 | 0.102    | <0.001  | 0.123 | <0.001  | 0.021  | 0.552   |
| 0.2                       | 44.02         | <0.001  | 0.267                       | 0.096 | 0.353            | 0.103 | 0.369       | 0.143 | 0.086    | <0.001  | 0.102 | <0.001  | 0.016  | 0.601   |
| 0.25                      | 44.44         | <0.001  | 0.223                       | 0.083 | 0.296            | 0.087 | 0.310       | 0.119 | 0.073    | <0.001  | 0.087 | <0.001  | 0.014  | 0.589   |
| 0.3                       | 44.47         | <0.001  | 0.190                       | 0.074 | 0.255            | 0.077 | 0.267       | 0.103 | 0.065    | <0.001  | 0.077 | <0.001  | 0.012  | 0.578   |
| 0.35                      | 44.65         | <0.001  | 0.165                       | 0.067 | 0.223            | 0.069 | 0.234       | 0.091 | 0.058    | <0.001  | 0.069 | <0.001  | 0.011  | 0.574   |
| 0.4                       | 44.20         | <0.001  | 0.144                       | 0.061 | 0.197            | 0.062 | 0.207       | 0.082 | 0.053    | <0.001  | 0.062 | <0.001  | 0.010  | 0.590   |
| 0.45                      | 43.84         | <0.001  | 0.128                       | 0.056 | 0.176            | 0.057 | 0.185       | 0.074 | 0.048    | <0.001  | 0.057 | <0.001  | 0.009  | 0.599   |
| 0.5                       | 43.36         | <0.001  | 0.114                       | 0.051 | 0.158            | 0.053 | 0.166       | 0.068 | 0.044    | <0.001  | 0.052 | <0.001  | 0.008  | 0.589   |

F F-statistic, SD standard deviation, MD mean difference

Bold values indicate significant differences



**Table S10** Sample entropy in the anterior-posterior direction as a function of  $r$  and  $m$  for a data length of  $N=1200$  (i.e. 60-seconds): eyes open – foam surface (OF)

| $r$                       | One-way ANOVA |         | Summary statistics by group |       |                  |       |             |       | Post-hoc |         |       |         |        |              |
|---------------------------|---------------|---------|-----------------------------|-------|------------------|-------|-------------|-------|----------|---------|-------|---------|--------|--------------|
|                           | F             | p-value | Young (Y)                   |       | Non-Fallers (NF) |       | Fallers (F) |       | NF - Y   |         | F - Y |         | F - NF |              |
|                           |               |         | Mean                        | SD    | Mean             | SD    | Mean        | SD    | MD       | p-value | MD    | p-value | MD     | p-value      |
| <b><math>m = 2</math></b> |               |         |                             |       |                  |       |             |       |          |         |       |         |        |              |
| 0.1                       | 70.99         | <0.001  | 0.585                       | 0.131 | 0.708            | 0.108 | 0.754       | 0.142 | 0.123    | <0.001  | 0.169 | <0.001  | 0.046  | <b>0.047</b> |
| 0.15                      | 76.61         | <0.001  | 0.457                       | 0.113 | 0.566            | 0.086 | 0.599       | 0.106 | 0.109    | <0.001  | 0.142 | <0.001  | 0.033  | 0.104        |
| 0.2                       | 76.84         | <0.001  | 0.369                       | 0.106 | 0.471            | 0.080 | 0.499       | 0.094 | 0.102    | <0.001  | 0.129 | <0.001  | 0.027  | 0.165        |
| 0.25                      | 76.30         | <0.001  | 0.304                       | 0.097 | 0.399            | 0.077 | 0.424       | 0.088 | 0.095    | <0.001  | 0.120 | <0.001  | 0.025  | 0.173        |
| 0.3                       | 74.13         | <0.001  | 0.254                       | 0.088 | 0.340            | 0.073 | 0.364       | 0.084 | 0.086    | <0.001  | 0.110 | <0.001  | 0.024  | 0.163        |
| 0.35                      | 72.06         | <0.001  | 0.216                       | 0.079 | 0.293            | 0.068 | 0.314       | 0.079 | 0.077    | <0.001  | 0.099 | <0.001  | 0.022  | 0.161        |
| 0.4                       | 70.07         | <0.001  | 0.186                       | 0.071 | 0.254            | 0.063 | 0.274       | 0.073 | 0.069    | <0.001  | 0.088 | <0.001  | 0.020  | 0.155        |
| 0.45                      | 68.05         | <0.001  | 0.162                       | 0.063 | 0.222            | 0.057 | 0.240       | 0.067 | 0.061    | <0.001  | 0.079 | <0.001  | 0.018  | 0.151        |
| 0.5                       | 66.23         | <0.001  | 0.142                       | 0.056 | 0.196            | 0.052 | 0.212       | 0.061 | 0.054    | <0.001  | 0.070 | <0.001  | 0.016  | 0.159        |
| <b><math>m = 3</math></b> |               |         |                             |       |                  |       |             |       |          |         |       |         |        |              |
| 0.1                       | 68.71         | <0.001  | 0.530                       | 0.145 | 0.668            | 0.124 | 0.714       | 0.163 | 0.138    | <0.001  | 0.184 | <0.001  | 0.046  | 0.092        |
| 0.15                      | 70.62         | <0.001  | 0.408                       | 0.109 | 0.514            | 0.097 | 0.552       | 0.126 | 0.106    | <0.001  | 0.144 | <0.001  | 0.039  | 0.056        |
| 0.2                       | 71.92         | <0.001  | 0.335                       | 0.090 | 0.421            | 0.078 | 0.453       | 0.099 | 0.087    | <0.001  | 0.118 | <0.001  | 0.032  | 0.054        |
| 0.25                      | 73.93         | <0.001  | 0.282                       | 0.079 | 0.359            | 0.066 | 0.385       | 0.084 | 0.077    | <0.001  | 0.103 | <0.001  | 0.026  | 0.067        |
| 0.3                       | 74.18         | <0.001  | 0.242                       | 0.072 | 0.312            | 0.059 | 0.335       | 0.073 | 0.069    | <0.001  | 0.092 | <0.001  | 0.023  | 0.081        |
| 0.35                      | 74.80         | <0.001  | 0.211                       | 0.066 | 0.275            | 0.054 | 0.295       | 0.066 | 0.064    | <0.001  | 0.085 | <0.001  | 0.020  | 0.094        |
| 0.4                       | 74.31         | <0.001  | 0.185                       | 0.061 | 0.244            | 0.051 | 0.262       | 0.060 | 0.059    | <0.001  | 0.078 | <0.001  | 0.018  | 0.106        |
| 0.45                      | 73.13         | <0.001  | 0.163                       | 0.057 | 0.218            | 0.048 | 0.234       | 0.056 | 0.055    | <0.001  | 0.071 | <0.001  | 0.017  | 0.118        |
| 0.5                       | 71.51         | <0.001  | 0.145                       | 0.052 | 0.195            | 0.045 | 0.210       | 0.052 | 0.050    | <0.001  | 0.066 | <0.001  | 0.015  | 0.127        |
| <b><math>m = 4</math></b> |               |         |                             |       |                  |       |             |       |          |         |       |         |        |              |
| 0.1                       | 68.10         | <0.001  | 0.510                       | 0.144 | 0.647            | 0.121 | 0.688       | 0.158 | 0.136    | <0.001  | 0.178 | <0.001  | 0.042  | 0.133        |
| 0.15                      | 70.46         | <0.001  | 0.393                       | 0.113 | 0.502            | 0.097 | 0.538       | 0.127 | 0.109    | <0.001  | 0.145 | <0.001  | 0.036  | 0.092        |
| 0.2                       | 70.62         | <0.001  | 0.321                       | 0.093 | 0.411            | 0.081 | 0.441       | 0.103 | 0.090    | <0.001  | 0.120 | <0.001  | 0.031  | 0.076        |
| 0.25                      | 71.45         | <0.001  | 0.270                       | 0.079 | 0.347            | 0.069 | 0.374       | 0.089 | 0.077    | <0.001  | 0.104 | <0.001  | 0.027  | 0.061        |
| 0.3                       | 71.42         | <0.001  | 0.233                       | 0.070 | 0.300            | 0.061 | 0.324       | 0.077 | 0.067    | <0.001  | 0.091 | <0.001  | 0.024  | 0.060        |
| 0.35                      | 72.06         | <0.001  | 0.204                       | 0.063 | 0.264            | 0.054 | 0.286       | 0.068 | 0.060    | <0.001  | 0.082 | <0.001  | 0.022  | 0.060        |
| 0.4                       | 72            | <0.001  | 0.180                       | 0.057 | 0.235            | 0.049 | 0.254       | 0.061 | 0.055    | <0.001  | 0.074 | <0.001  | 0.019  | 0.068        |
| 0.45                      | 71.81         | <0.001  | 0.160                       | 0.052 | 0.210            | 0.045 | 0.227       | 0.055 | 0.050    | <0.001  | 0.068 | <0.001  | 0.017  | 0.070        |
| 0.5                       | 71.01         | <0.001  | 0.143                       | 0.048 | 0.189            | 0.042 | 0.205       | 0.050 | 0.046    | <0.001  | 0.062 | <0.001  | 0.016  | 0.076        |
| <b><math>m = 5</math></b> |               |         |                             |       |                  |       |             |       |          |         |       |         |        |              |
| 0.1                       | 69.61         | <0.001  | 0.486                       | 0.137 | 0.616            | 0.119 | 0.665       | 0.159 | 0.130    | <0.001  | 0.180 | <0.001  | 0.050  | <b>0.047</b> |
| 0.15                      | 69.65         | <0.001  | 0.379                       | 0.110 | 0.484            | 0.093 | 0.520       | 0.125 | 0.105    | <0.001  | 0.141 | <0.001  | 0.036  | 0.075        |
| 0.2                       | 70.31         | <0.001  | 0.311                       | 0.092 | 0.400            | 0.079 | 0.429       | 0.101 | 0.088    | <0.001  | 0.117 | <0.001  | 0.029  | 0.092        |
| 0.25                      | 70.65         | <0.001  | 0.264                       | 0.079 | 0.340            | 0.068 | 0.366       | 0.089 | 0.076    | <0.001  | 0.102 | <0.001  | 0.026  | 0.078        |
| 0.3                       | 70.41         | <0.001  | 0.227                       | 0.070 | 0.294            | 0.060 | 0.318       | 0.078 | 0.067    | <0.001  | 0.091 | <0.001  | 0.024  | 0.062        |
| 0.35                      | 70.12         | <0.001  | 0.199                       | 0.062 | 0.259            | 0.054 | 0.28        | 0.069 | 0.060    | <0.001  | 0.081 | <0.001  | 0.021  | 0.062        |
| 0.4                       | 70.06         | <0.001  | 0.176                       | 0.056 | 0.230            | 0.049 | 0.249       | 0.061 | 0.054    | <0.001  | 0.073 | <0.001  | 0.019  | 0.070        |
| 0.45                      | 69.37         | <0.001  | 0.157                       | 0.051 | 0.206            | 0.045 | 0.223       | 0.055 | 0.049    | <0.001  | 0.066 | <0.001  | 0.017  | 0.070        |
| 0.5                       | 68.61         | <0.001  | 0.141                       | 0.047 | 0.185            | 0.041 | 0.201       | 0.050 | 0.045    | <0.001  | 0.060 | <0.001  | 0.016  | 0.076        |

$F$  F-statistic,  $SD$  standard deviation,  $MD$  mean difference

Bold values indicate significant differences

**Table S11** Sample entropy in the anterior-posterior direction as a function of  $r$  and  $m$  for a data length of  $N=1200$  (i.e. 60-seconds): eyes closed – foam surface (CF)

| $r$                       | One-way ANOVA |         | Summary statistics by group |       |                  |       |             |       | Post-hoc |         |       |         |        |         |
|---------------------------|---------------|---------|-----------------------------|-------|------------------|-------|-------------|-------|----------|---------|-------|---------|--------|---------|
|                           | F             | p-value | Young (Y)                   |       | Non-Fallers (NF) |       | Fallers (F) |       | NF - Y   |         | F - Y |         | F - NF |         |
|                           |               |         | Mean                        | SD    | Mean             | SD    | Mean        | SD    | MD       | p-value | MD    | p-value | MD     | p-value |
| <b><math>m = 2</math></b> |               |         |                             |       |                  |       |             |       |          |         |       |         |        |         |
| 0.1                       | 20.34         | <0.001  | 0.667                       | 0.142 | 0.738            | 0.111 | 0.764       | 0.148 | 0.071    | <0.001  | 0.097 | <0.001  | 0.026  | 0.435   |
| 0.15                      | 23.51         | <0.001  | 0.532                       | 0.111 | 0.591            | 0.085 | 0.610       | 0.110 | 0.060    | <0.001  | 0.079 | <0.001  | 0.019  | 0.483   |
| 0.2                       | 25.31         | <0.001  | 0.440                       | 0.100 | 0.497            | 0.079 | 0.512       | 0.097 | 0.057    | <0.001  | 0.072 | <0.001  | 0.015  | 0.585   |
| 0.25                      | 25.36         | <0.001  | 0.371                       | 0.093 | 0.425            | 0.076 | 0.437       | 0.091 | 0.054    | <0.001  | 0.066 | <0.001  | 0.013  | 0.638   |
| 0.3                       | 24.61         | <0.001  | 0.315                       | 0.086 | 0.365            | 0.073 | 0.377       | 0.087 | 0.050    | <0.001  | 0.061 | <0.001  | 0.012  | 0.653   |
| 0.35                      | 23.83         | <0.001  | 0.271                       | 0.079 | 0.316            | 0.068 | 0.327       | 0.081 | 0.045    | <0.001  | 0.056 | <0.001  | 0.011  | 0.646   |
| 0.4                       | 22.97         | <0.001  | 0.235                       | 0.072 | 0.276            | 0.064 | 0.286       | 0.075 | 0.041    | <0.001  | 0.051 | <0.001  | 0.010  | 0.617   |
| 0.45                      | 22.15         | <0.001  | 0.206                       | 0.065 | 0.242            | 0.058 | 0.252       | 0.069 | 0.036    | <0.001  | 0.046 | <0.001  | 0.010  | 0.594   |
| 0.5                       | 21.49         | <0.001  | 0.182                       | 0.059 | 0.214            | 0.053 | 0.223       | 0.062 | 0.032    | <0.001  | 0.041 | <0.001  | 0.009  | 0.572   |
| <b><math>m = 3</math></b> |               |         |                             |       |                  |       |             |       |          |         |       |         |        |         |
| 0.1                       | 20.78         | <0.001  | 0.615                       | 0.158 | 0.697            | 0.124 | 0.717       | 0.161 | 0.082    | <0.001  | 0.103 | <0.001  | 0.020  | 0.667   |
| 0.15                      | 21.93         | <0.001  | 0.476                       | 0.120 | 0.540            | 0.099 | 0.561       | 0.127 | 0.064    | <0.001  | 0.085 | <0.001  | 0.021  | 0.487   |
| 0.2                       | 21.92         | <0.001  | 0.394                       | 0.097 | 0.445            | 0.080 | 0.463       | 0.102 | 0.051    | <0.001  | 0.070 | <0.001  | 0.018  | 0.423   |
| 0.25                      | 22.99         | <0.001  | 0.336                       | 0.082 | 0.380            | 0.068 | 0.396       | 0.086 | 0.044    | <0.001  | 0.060 | <0.001  | 0.016  | 0.405   |
| 0.3                       | 22.99         | <0.001  | 0.292                       | 0.073 | 0.332            | 0.061 | 0.345       | 0.075 | 0.040    | <0.001  | 0.053 | <0.001  | 0.013  | 0.466   |
| 0.35                      | 23.28         | <0.001  | 0.257                       | 0.066 | 0.293            | 0.056 | 0.304       | 0.068 | 0.037    | <0.001  | 0.047 | <0.001  | 0.011  | 0.528   |
| 0.4                       | 23.12         | <0.001  | 0.228                       | 0.061 | 0.261            | 0.052 | 0.271       | 0.062 | 0.034    | <0.001  | 0.044 | <0.001  | 0.010  | 0.534   |
| 0.45                      | 23            | <0.001  | 0.203                       | 0.056 | 0.234            | 0.049 | 0.243       | 0.058 | 0.031    | <0.001  | 0.040 | <0.001  | 0.009  | 0.560   |
| 0.5                       | 22.90         | <0.001  | 0.182                       | 0.052 | 0.211            | 0.046 | 0.219       | 0.054 | 0.029    | <0.001  | 0.037 | <0.001  | 0.008  | 0.570   |
| <b><math>m = 4</math></b> |               |         |                             |       |                  |       |             |       |          |         |       |         |        |         |
| 0.1                       | 21.36         | <0.001  | 0.592                       | 0.151 | 0.671            | 0.119 | 0.693       | 0.159 | 0.079    | <0.001  | 0.101 | <0.001  | 0.022  | 0.604   |
| 0.15                      | 22.49         | <0.001  | 0.461                       | 0.121 | 0.527            | 0.097 | 0.543       | 0.125 | 0.066    | <0.001  | 0.082 | <0.001  | 0.016  | 0.663   |
| 0.2                       | 22.47         | <0.001  | 0.380                       | 0.101 | 0.434            | 0.083 | 0.450       | 0.104 | 0.055    | <0.001  | 0.070 | <0.001  | 0.015  | 0.581   |
| 0.25                      | 23.09         | <0.001  | 0.322                       | 0.085 | 0.369            | 0.071 | 0.384       | 0.089 | 0.047    | <0.001  | 0.061 | <0.001  | 0.015  | 0.505   |
| 0.3                       | 22.70         | <0.001  | 0.280                       | 0.074 | 0.320            | 0.063 | 0.333       | 0.078 | 0.040    | <0.001  | 0.053 | <0.001  | 0.013  | 0.491   |
| 0.35                      | 22.55         | <0.001  | 0.246                       | 0.065 | 0.282            | 0.057 | 0.293       | 0.069 | 0.036    | <0.001  | 0.047 | <0.001  | 0.011  | 0.519   |
| 0.4                       | 22.37         | <0.001  | 0.219                       | 0.059 | 0.251            | 0.051 | 0.261       | 0.062 | 0.032    | <0.001  | 0.042 | <0.001  | 0.010  | 0.500   |
| 0.45                      | 22.18         | <0.001  | 0.197                       | 0.053 | 0.226            | 0.047 | 0.235       | 0.056 | 0.029    | <0.001  | 0.038 | <0.001  | 0.009  | 0.499   |
| 0.5                       | 22.19         | <0.001  | 0.177                       | 0.049 | 0.204            | 0.044 | 0.212       | 0.051 | 0.027    | <0.001  | 0.035 | <0.001  | 0.009  | 0.495   |
| <b><math>m = 5</math></b> |               |         |                             |       |                  |       |             |       |          |         |       |         |        |         |
| 0.1                       | 21.71         | <0.001  | 0.560                       | 0.143 | 0.636            | 0.116 | 0.660       | 0.156 | 0.076    | <0.001  | 0.100 | <0.001  | 0.024  | 0.514   |
| 0.15                      | 22.43         | <0.001  | 0.444                       | 0.115 | 0.507            | 0.092 | 0.523       | 0.122 | 0.063    | <0.001  | 0.079 | <0.001  | 0.016  | 0.623   |
| 0.2                       | 22.55         | <0.001  | 0.368                       | 0.098 | 0.422            | 0.080 | 0.436       | 0.102 | 0.054    | <0.001  | 0.068 | <0.001  | 0.014  | 0.609   |
| 0.25                      | 23.24         | <0.001  | 0.314                       | 0.084 | 0.361            | 0.070 | 0.373       | 0.088 | 0.047    | <0.001  | 0.059 | <0.001  | 0.012  | 0.600   |
| 0.3                       | 23.32         | <0.001  | 0.273                       | 0.074 | 0.314            | 0.062 | 0.325       | 0.077 | 0.041    | <0.001  | 0.052 | <0.001  | 0.011  | 0.587   |
| 0.35                      | 23.09         | <0.001  | 0.240                       | 0.065 | 0.277            | 0.057 | 0.286       | 0.068 | 0.037    | <0.001  | 0.046 | <0.001  | 0.010  | 0.608   |
| 0.4                       | 22.76         | <0.001  | 0.214                       | 0.058 | 0.247            | 0.052 | 0.255       | 0.061 | 0.033    | <0.001  | 0.041 | <0.001  | 0.009  | 0.597   |
| 0.45                      | 22.27         | <0.001  | 0.192                       | 0.053 | 0.221            | 0.047 | 0.230       | 0.056 | 0.029    | <0.001  | 0.038 | <0.001  | 0.008  | 0.569   |
| 0.5                       | 21.98         | <0.001  | 0.174                       | 0.048 | 0.200            | 0.044 | 0.208       | 0.051 | 0.026    | <0.001  | 0.034 | <0.001  | 0.008  | 0.543   |

F F-statistic, SD standard deviation, MD mean difference

Bold values indicate significant differences
